# Supplementary material for: Efficient routes toward the synthesis of the D-rhamno-trisaccharide related to the A-band polysaccharide of Pseudomonas aeruginosa
Source: publisher site journal article supplement (doi:10.3762/bjoc.10.153), 2014-07-01

## Supporting Information File 2

for

# Efficient routes toward the synthesis of the *D-rhamno*-trisaccharide related to the A-band polysaccharide of *Pseudomonas aeruginosa*.

Aritra Chaudhury, Sajal K. Maity and Rina Ghosh\*

Address: Department of Chemistry, Jadavpur University, Kolkata 700 032, India

Email: Rina Ghosh\* - ghoshrina@yahoo.com

\*Corresponding author

## **<sup>1</sup>H and <sup>13</sup>C NMR of compounds 2a, 4, 6, 8–13 and 2D NMR (COSY, HSQC and HMBC) of compound 10**

### **Table of Contents**

|                                                  |         |
|--------------------------------------------------|---------|
| 1H and <sup>13</sup> C NMR of compound <b>2a</b> | S2      |
| 1H and <sup>13</sup> C NMR of compound <b>4</b>  | S3      |
| 1H and <sup>13</sup> C NMR of compound <b>6</b>  | S4      |
| 1H and <sup>13</sup> C NMR of compound <b>8</b>  | S5      |
| 1H and <sup>13</sup> C NMR of compound <b>9</b>  | S6      |
| 1H and <sup>13</sup> C NMR of compound <b>11</b> | S7      |
| 1H and <sup>13</sup> C NMR of compound <b>12</b> | S8      |
| 1H and <sup>13</sup> C NMR of compound <b>13</b> | S9      |
| 1H and <sup>13</sup> C NMR of compound <b>10</b> | S10     |
| 1H-1H COSY spectra of compound <b>10</b>         | S11–S12 |
| HSQC spectra of compound <b>10</b>               | S13–S15 |
| HMBC spectra of compound <b>10</b>               | S16–21  |

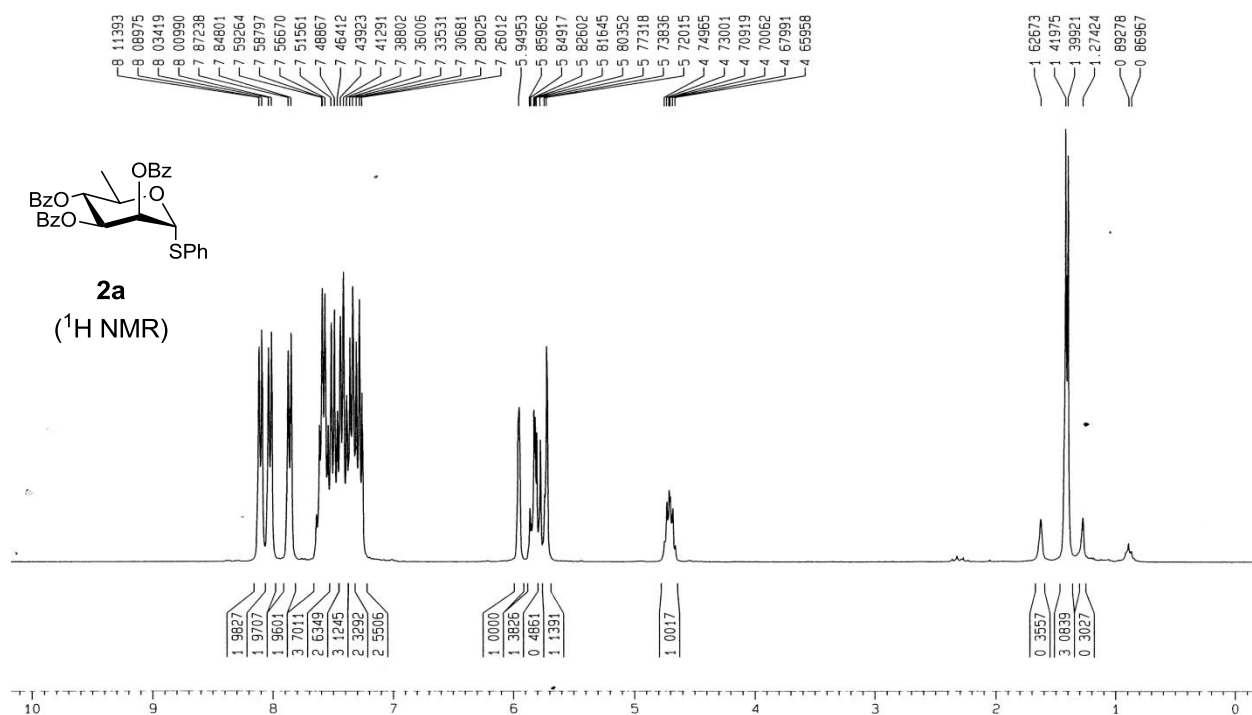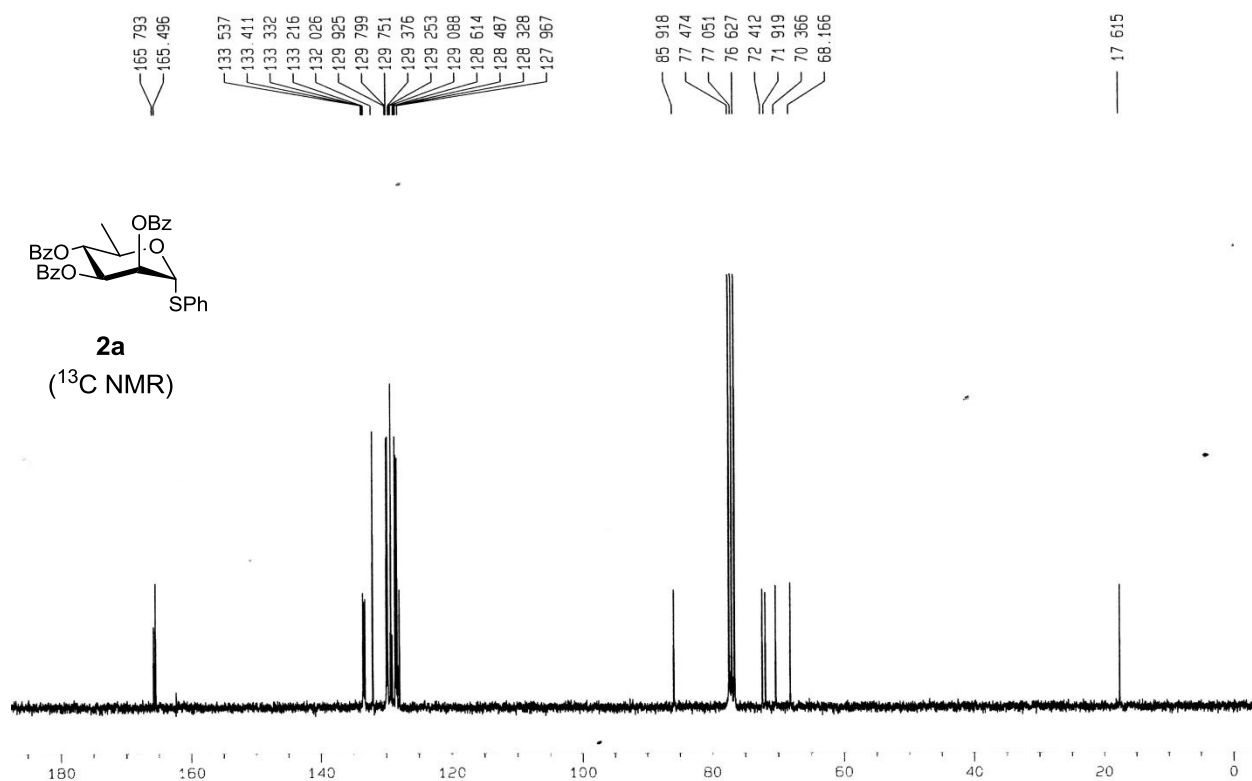

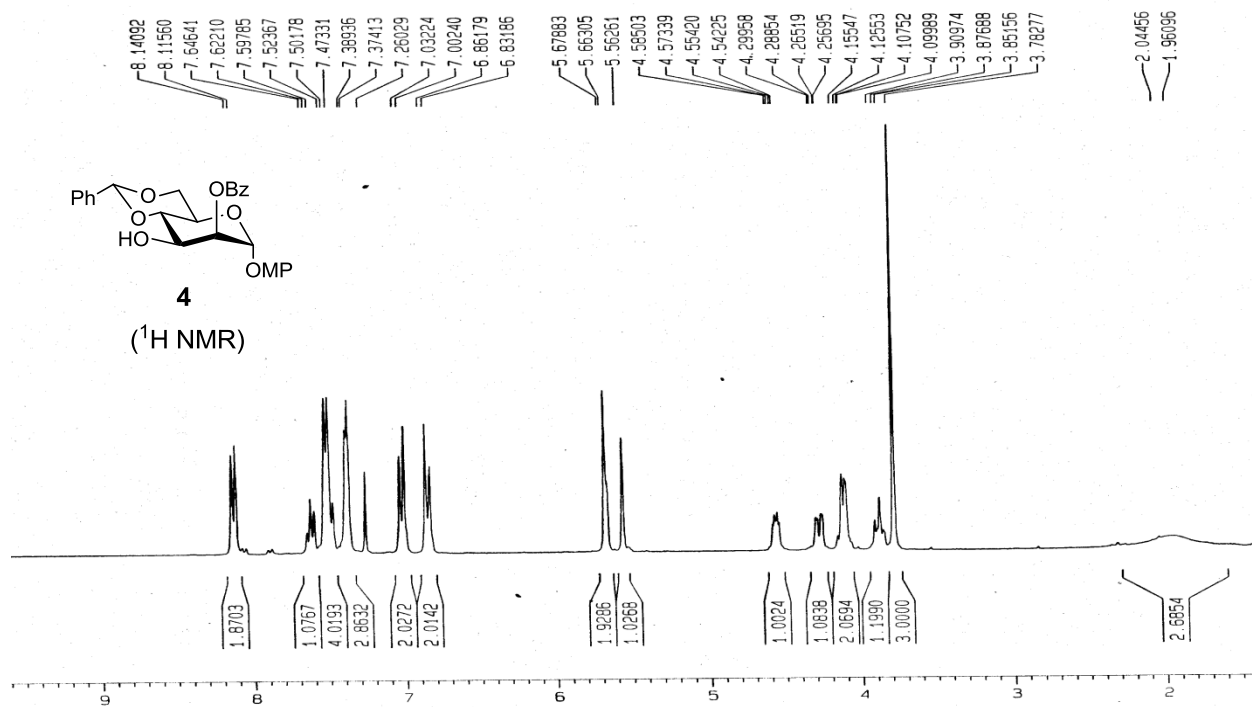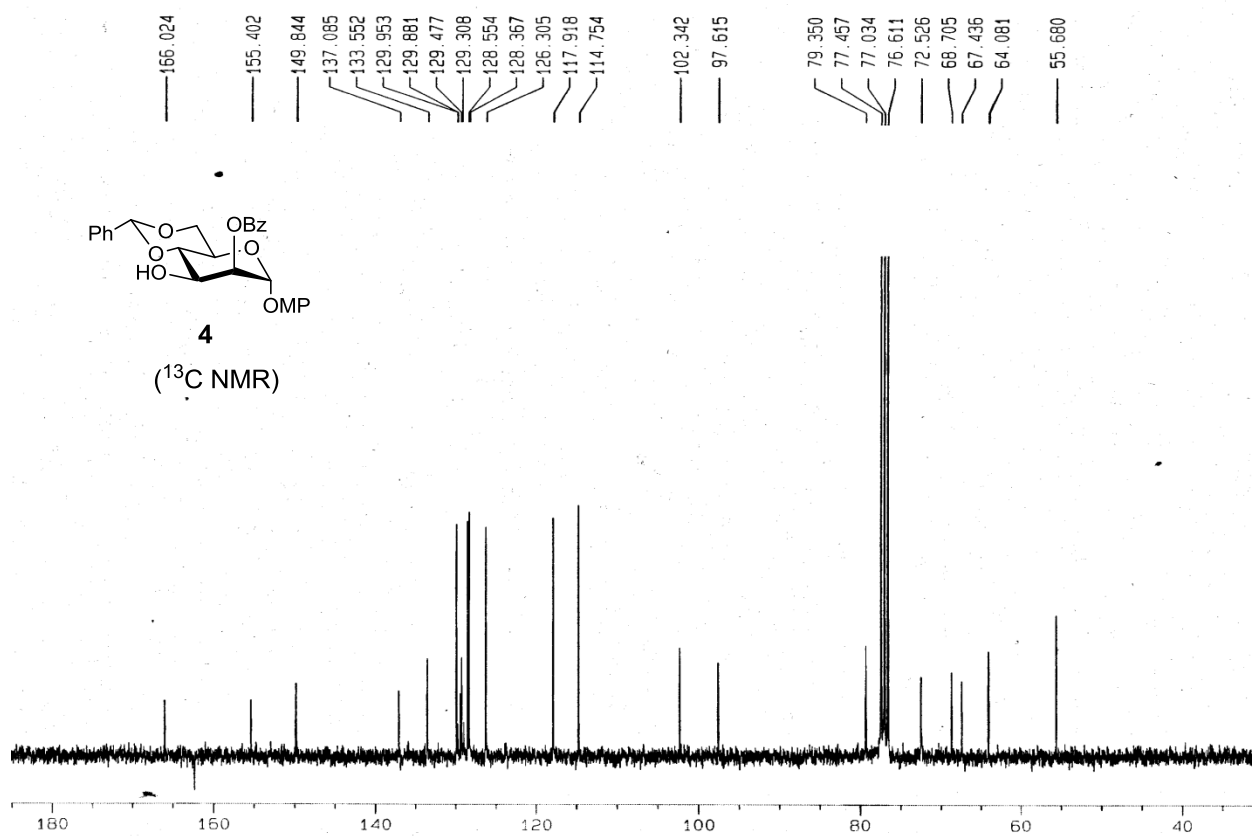

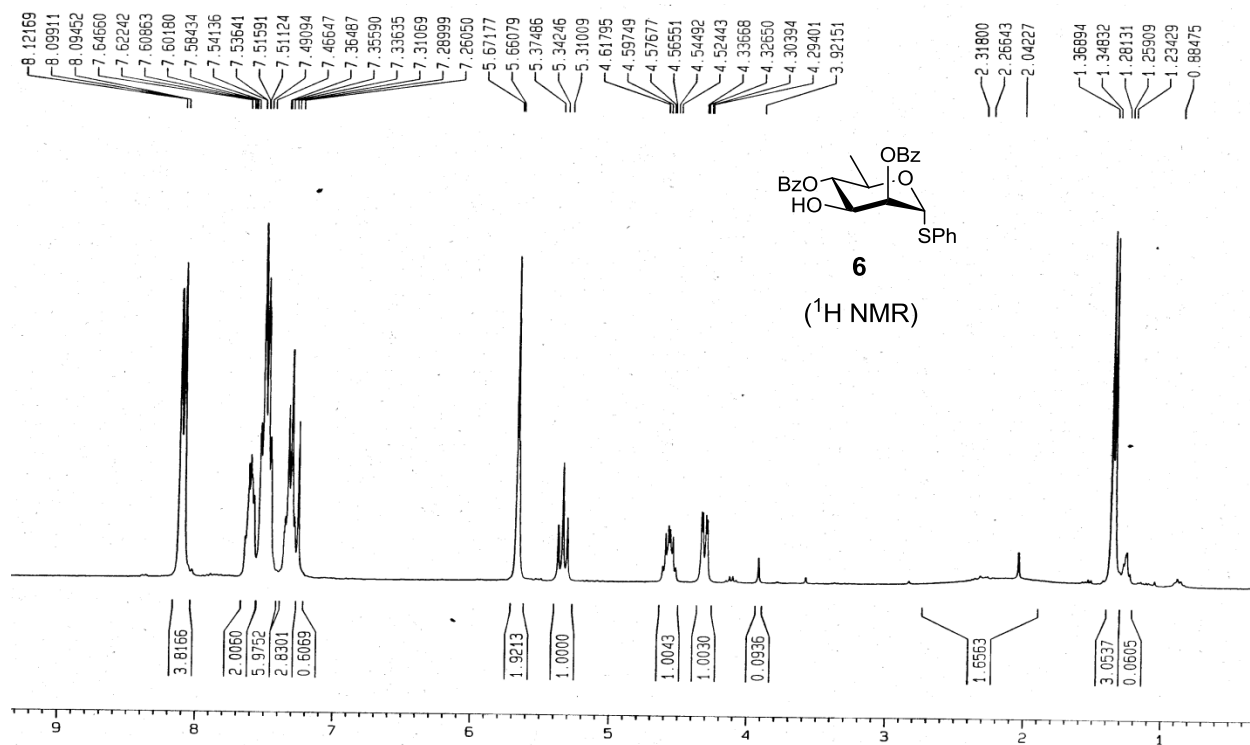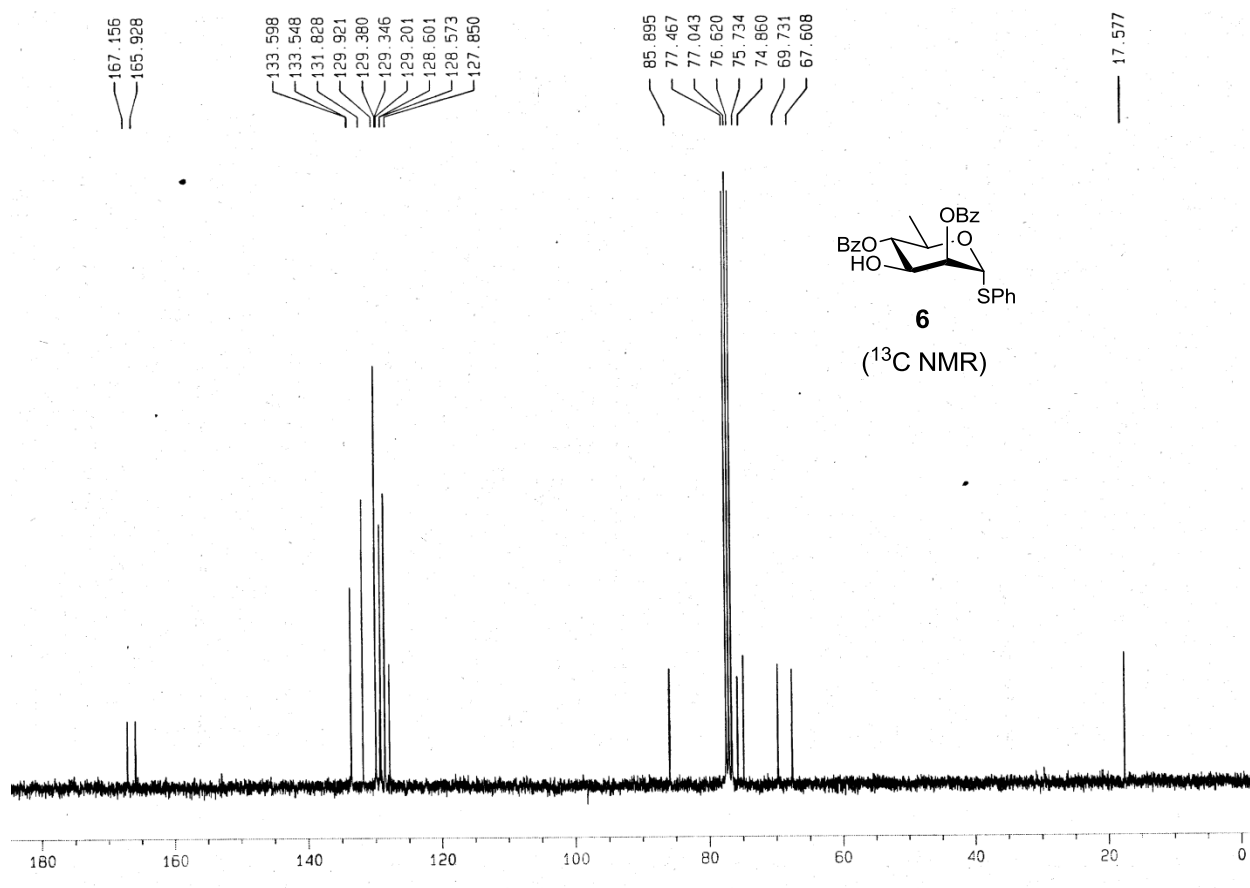

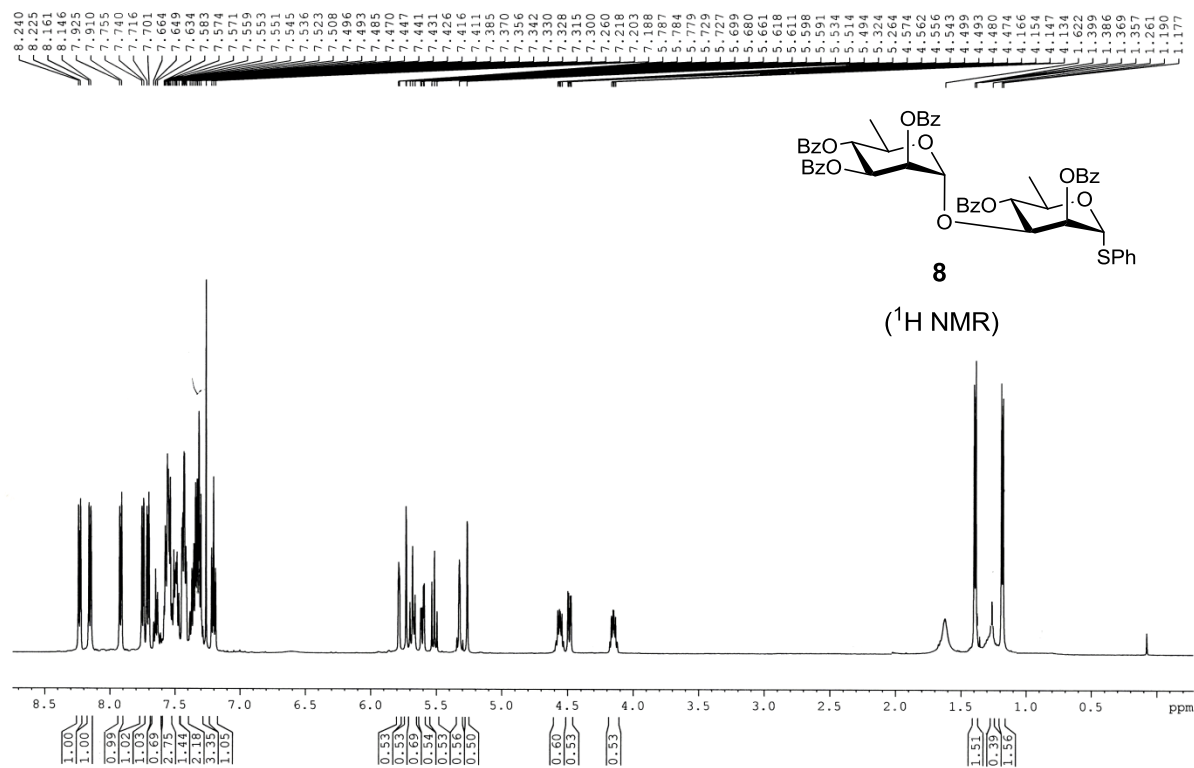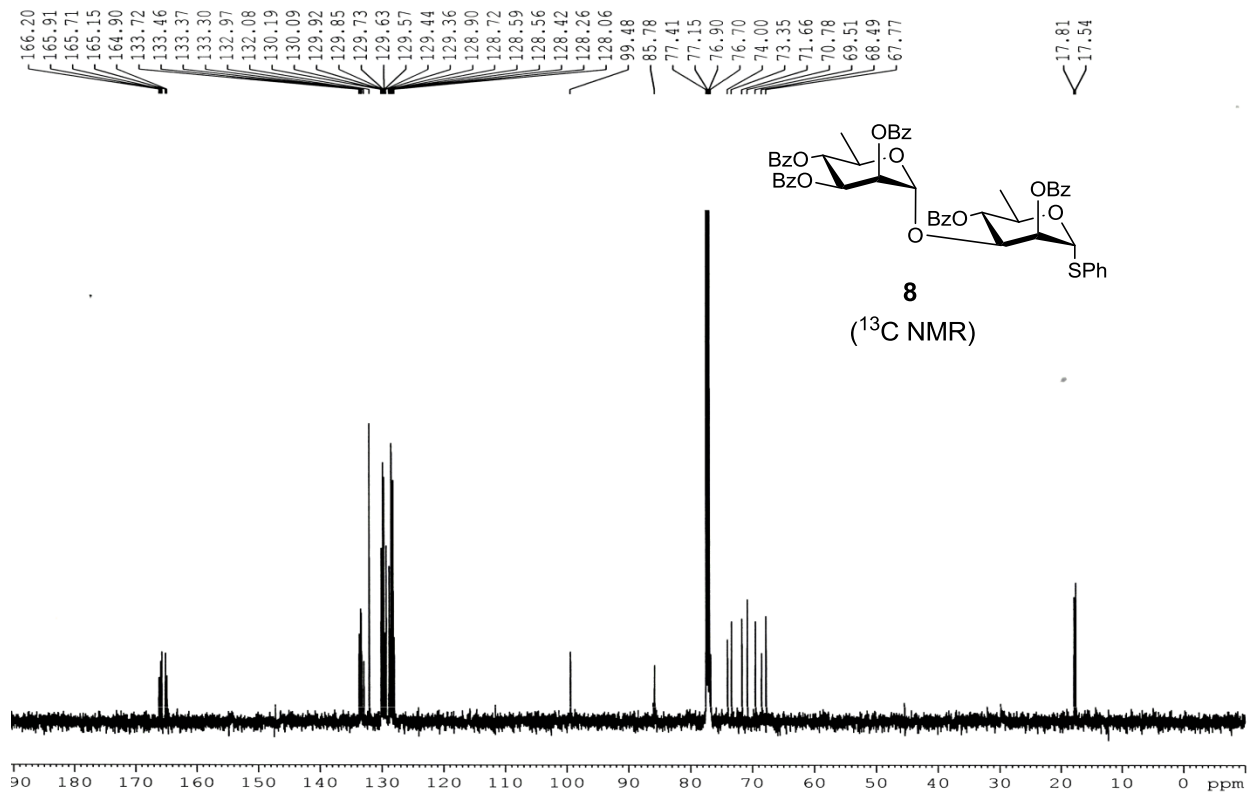

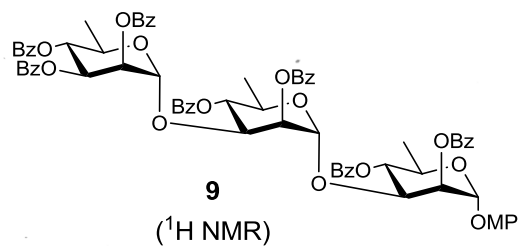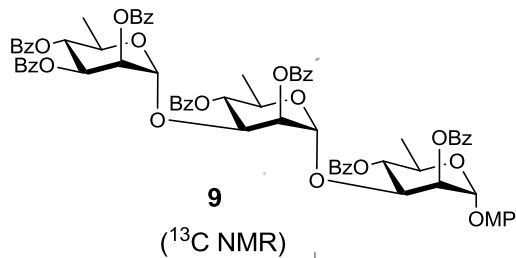

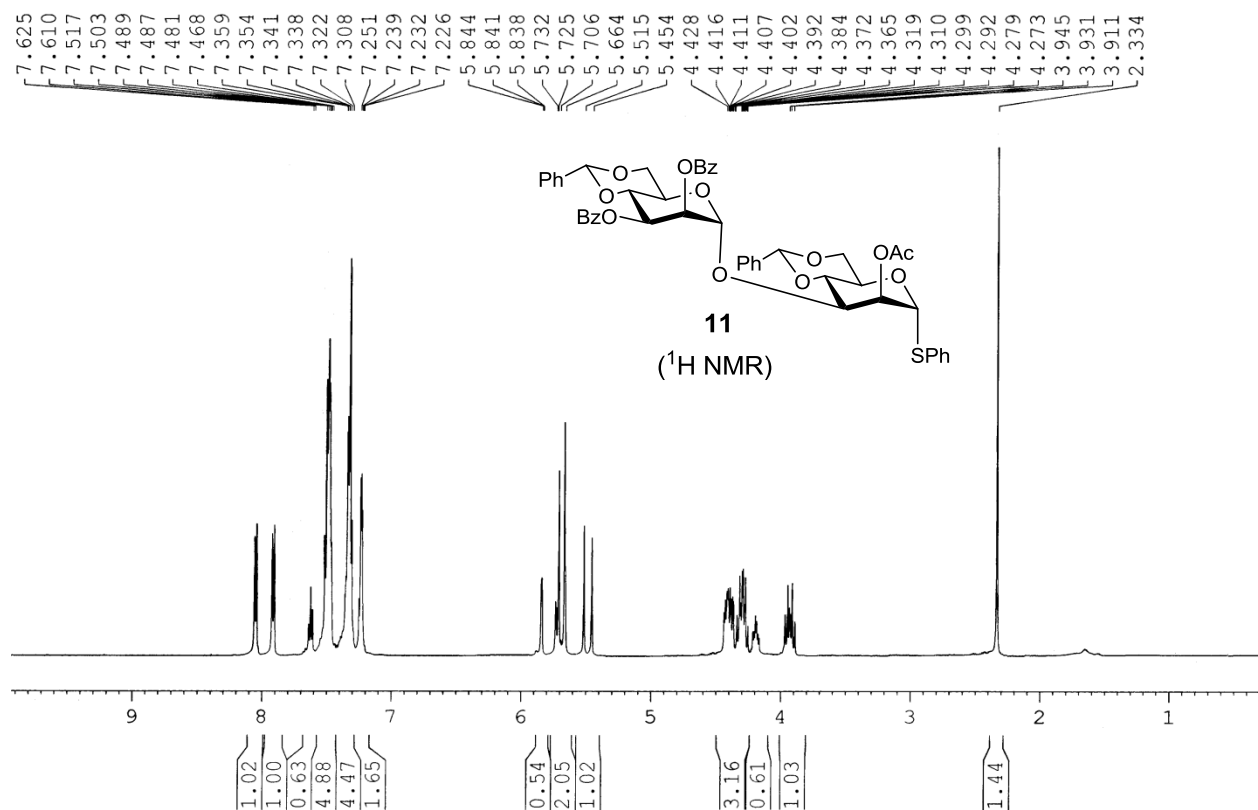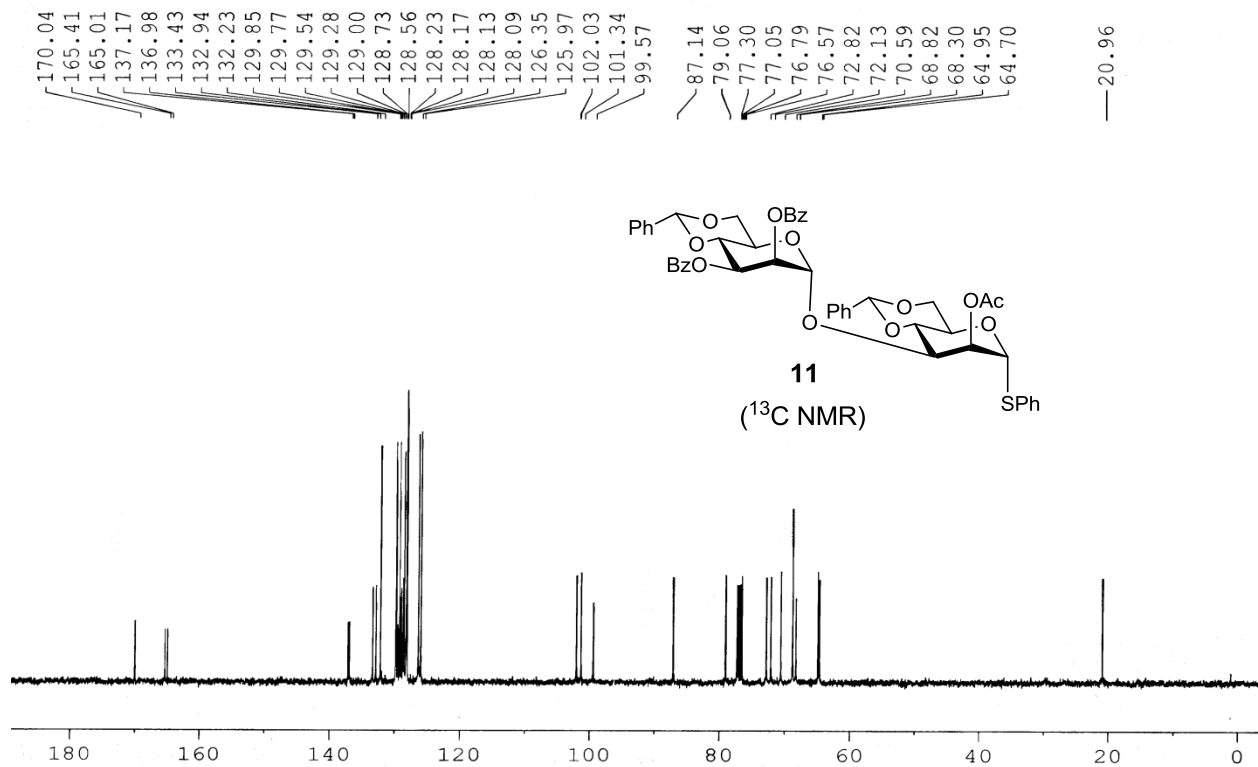

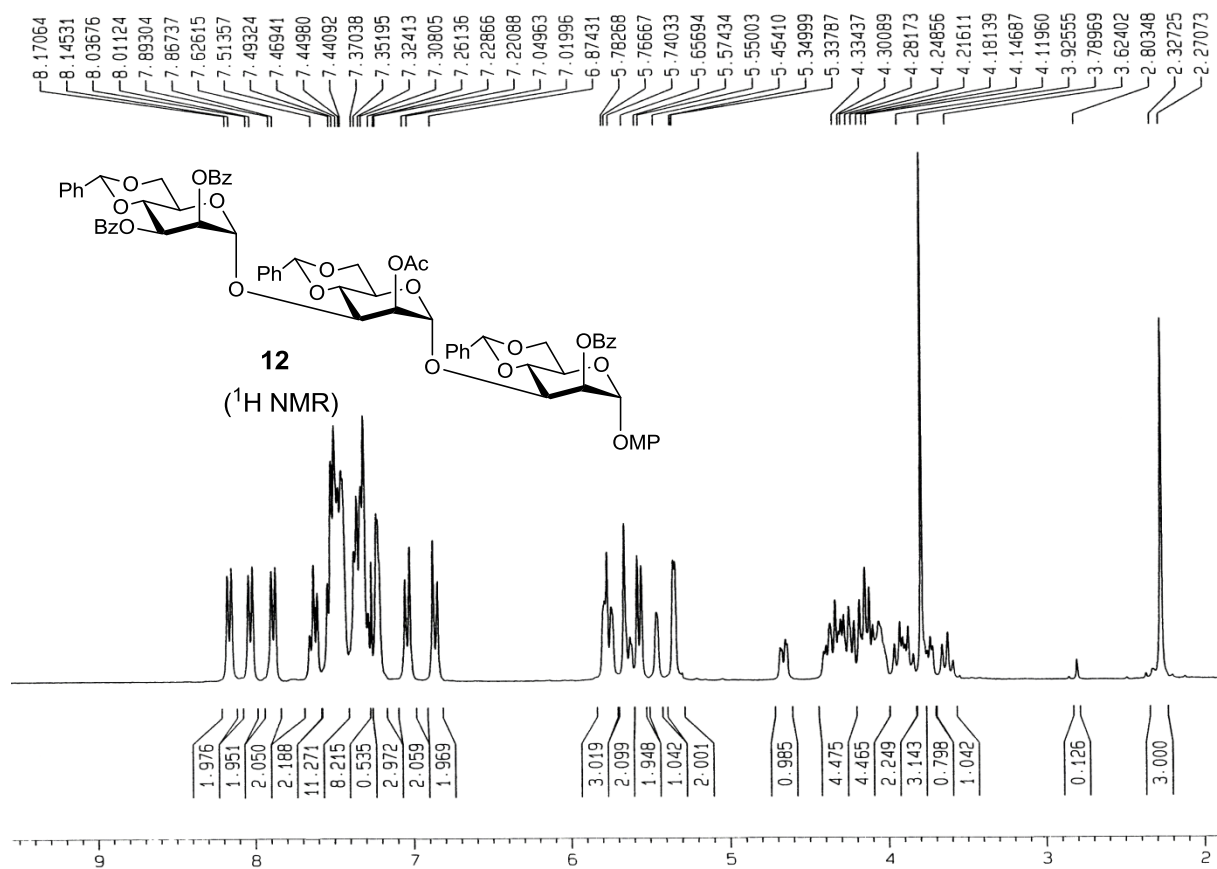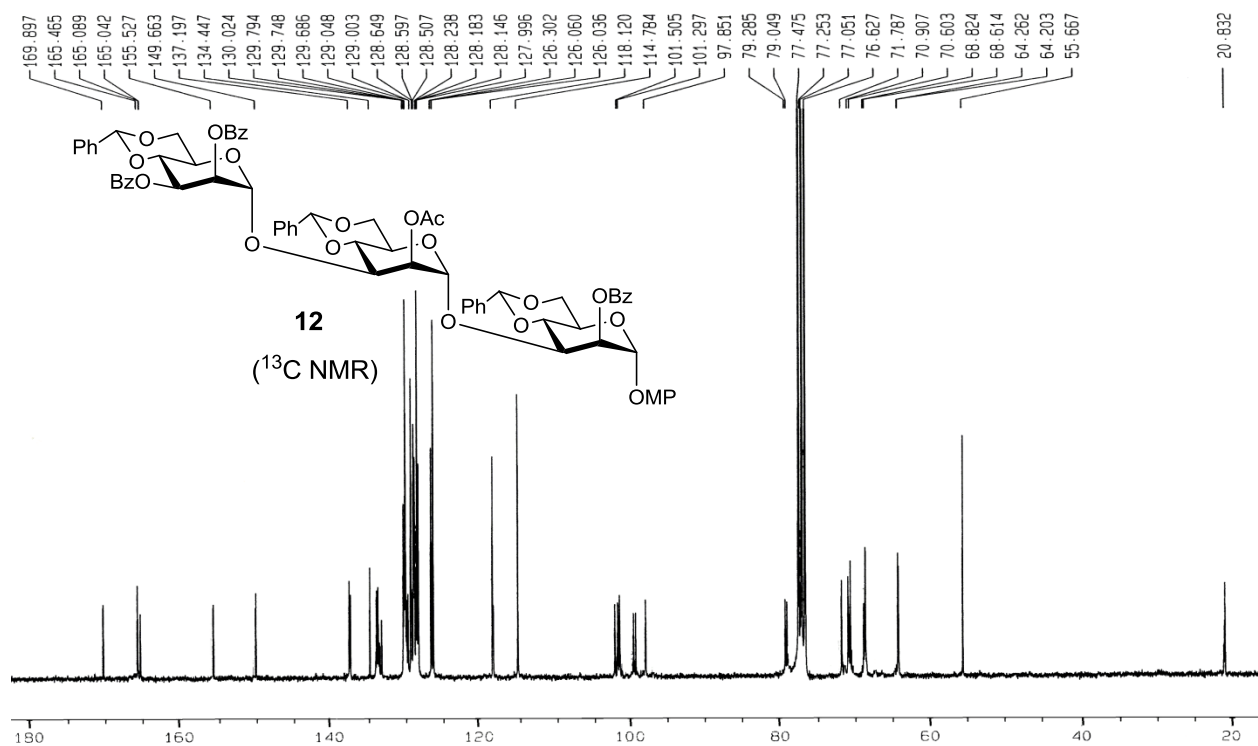



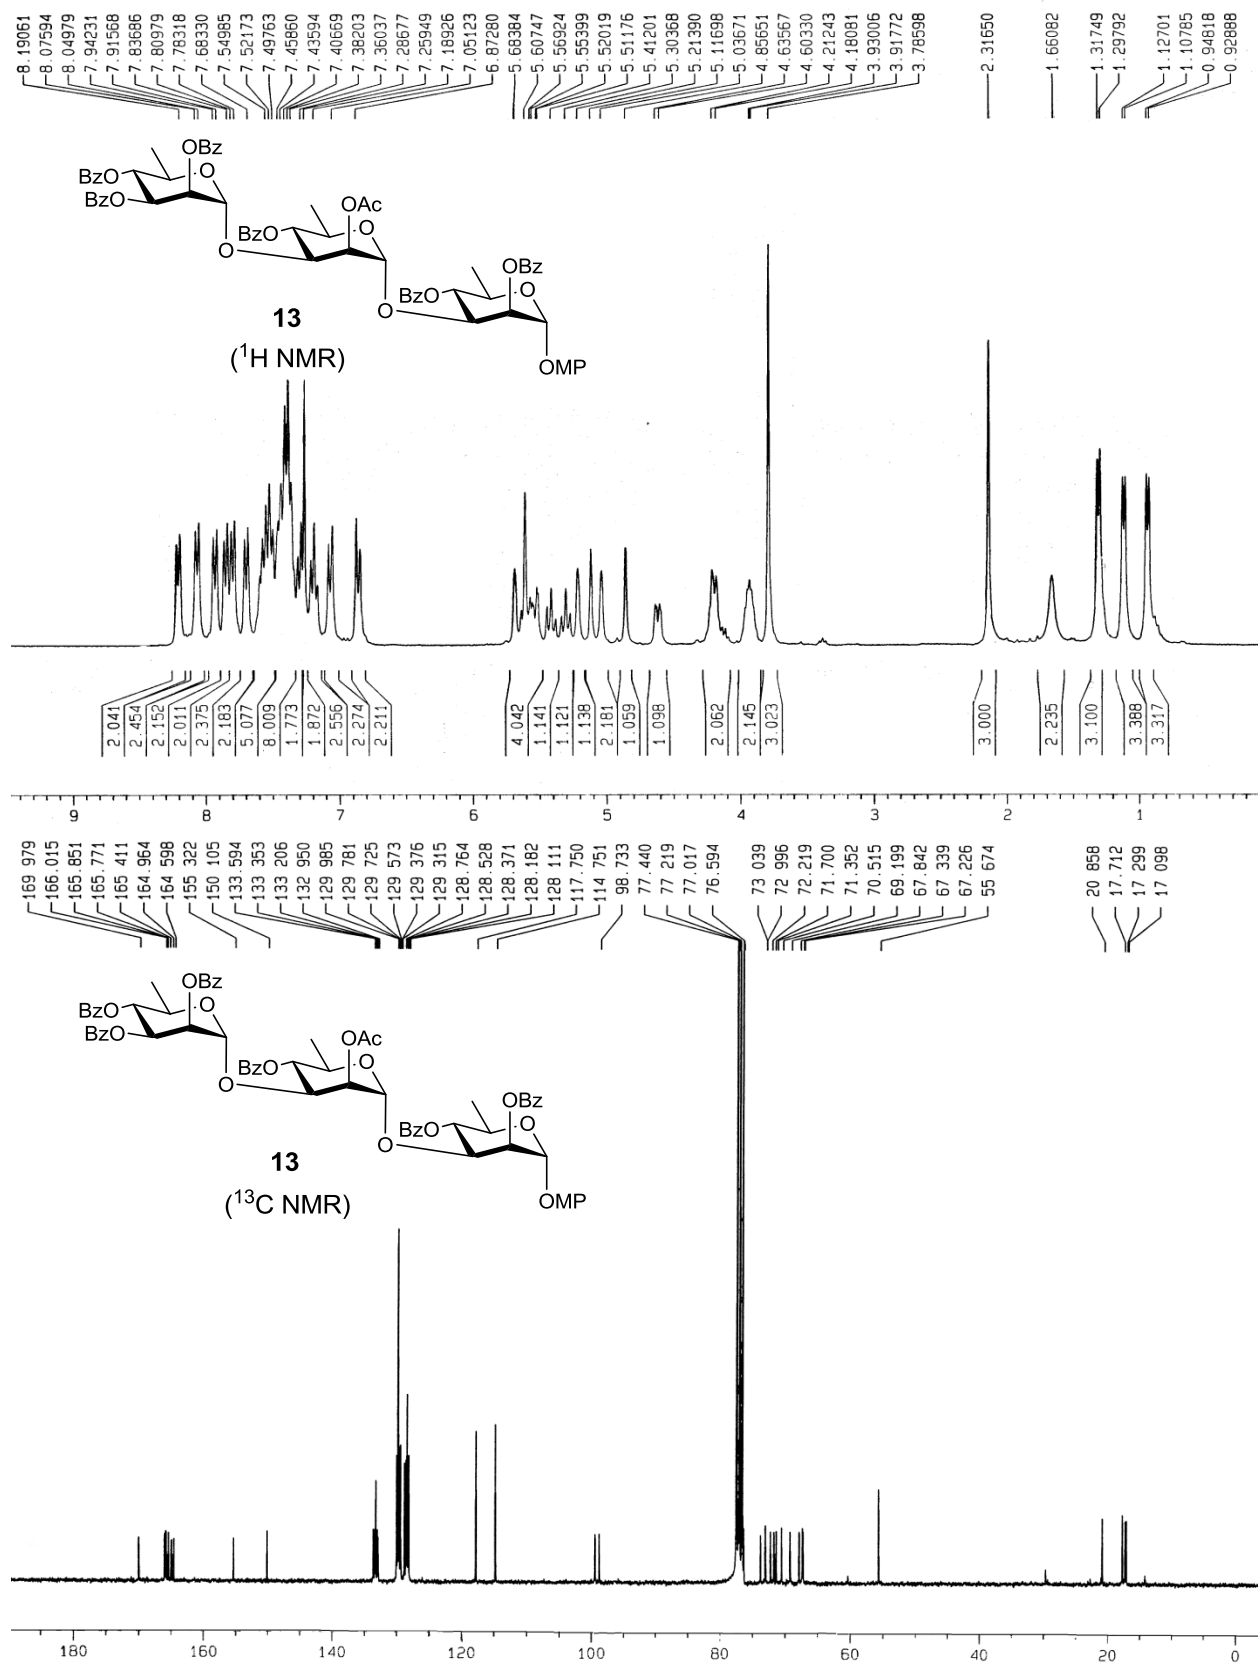

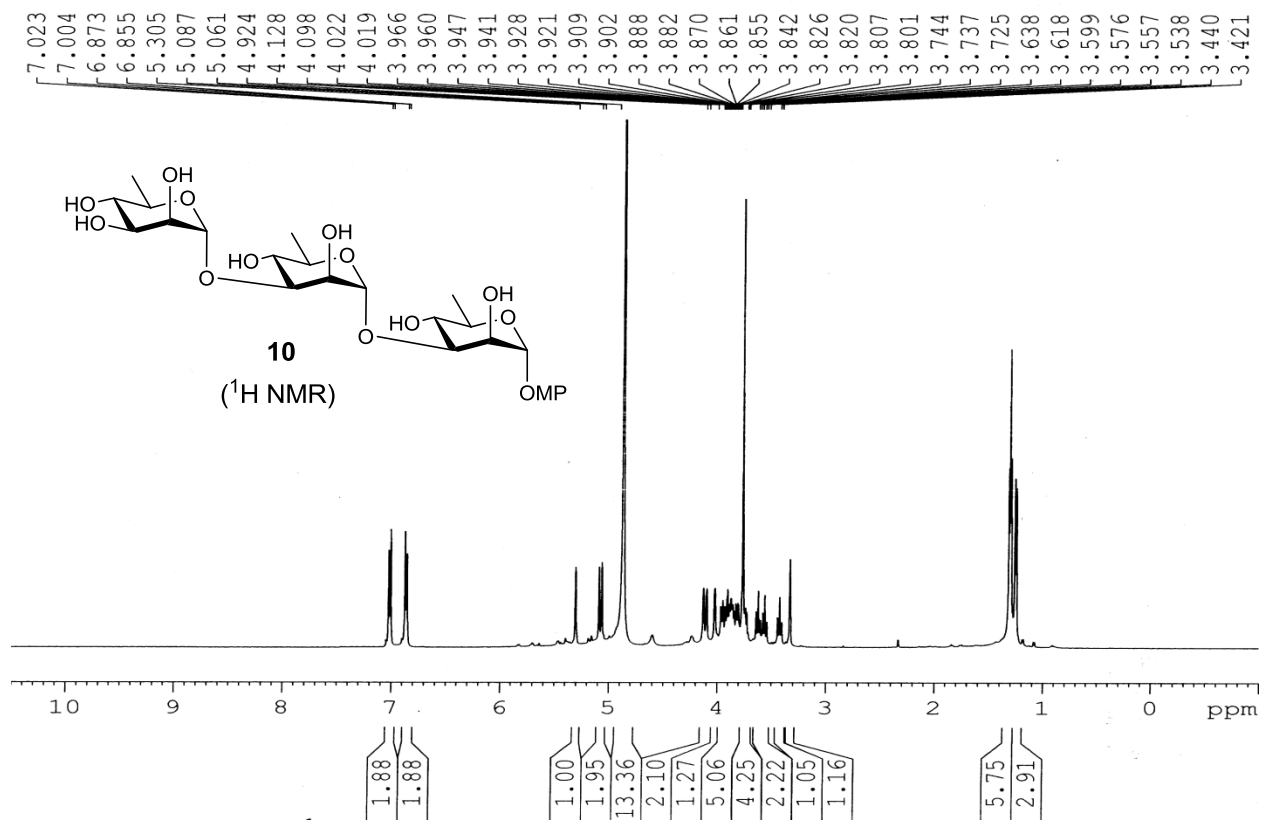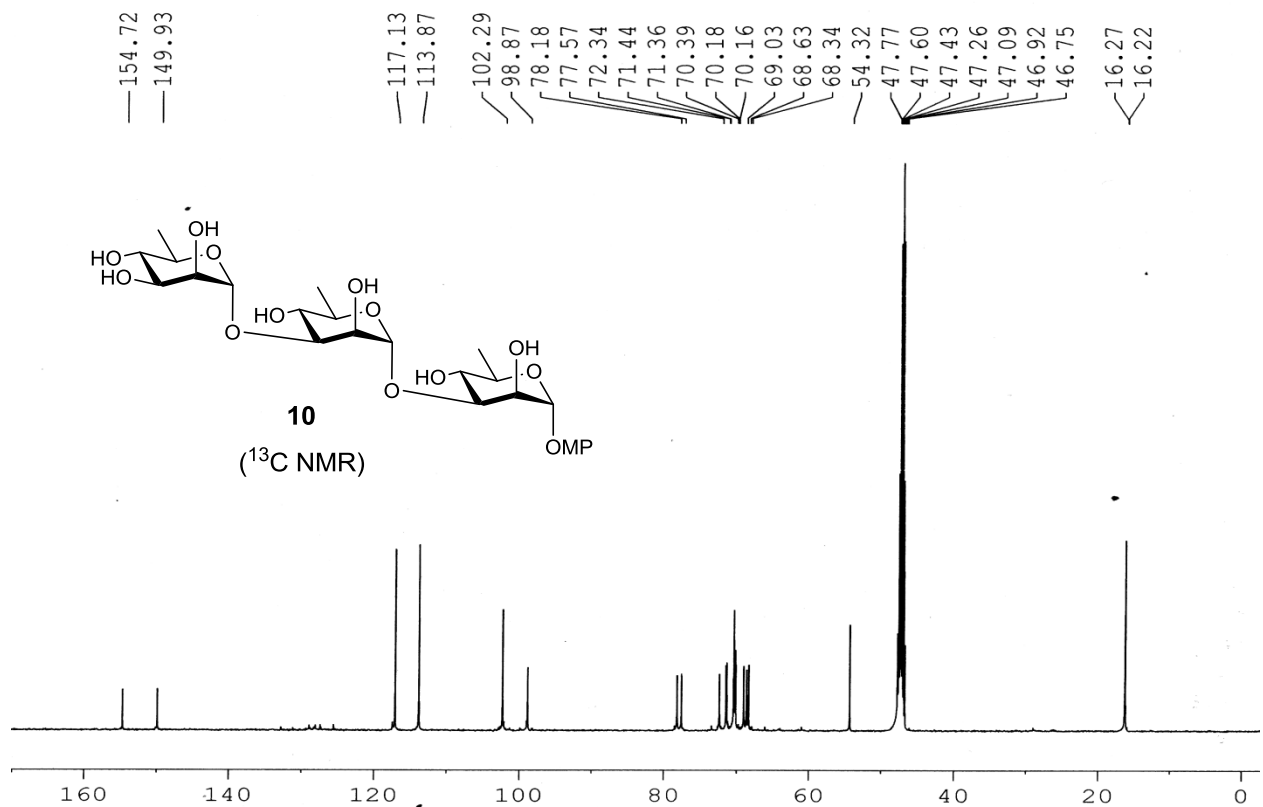

**$^1\text{H}$ - $^1\text{H}$  COSY spectra of compound 10**

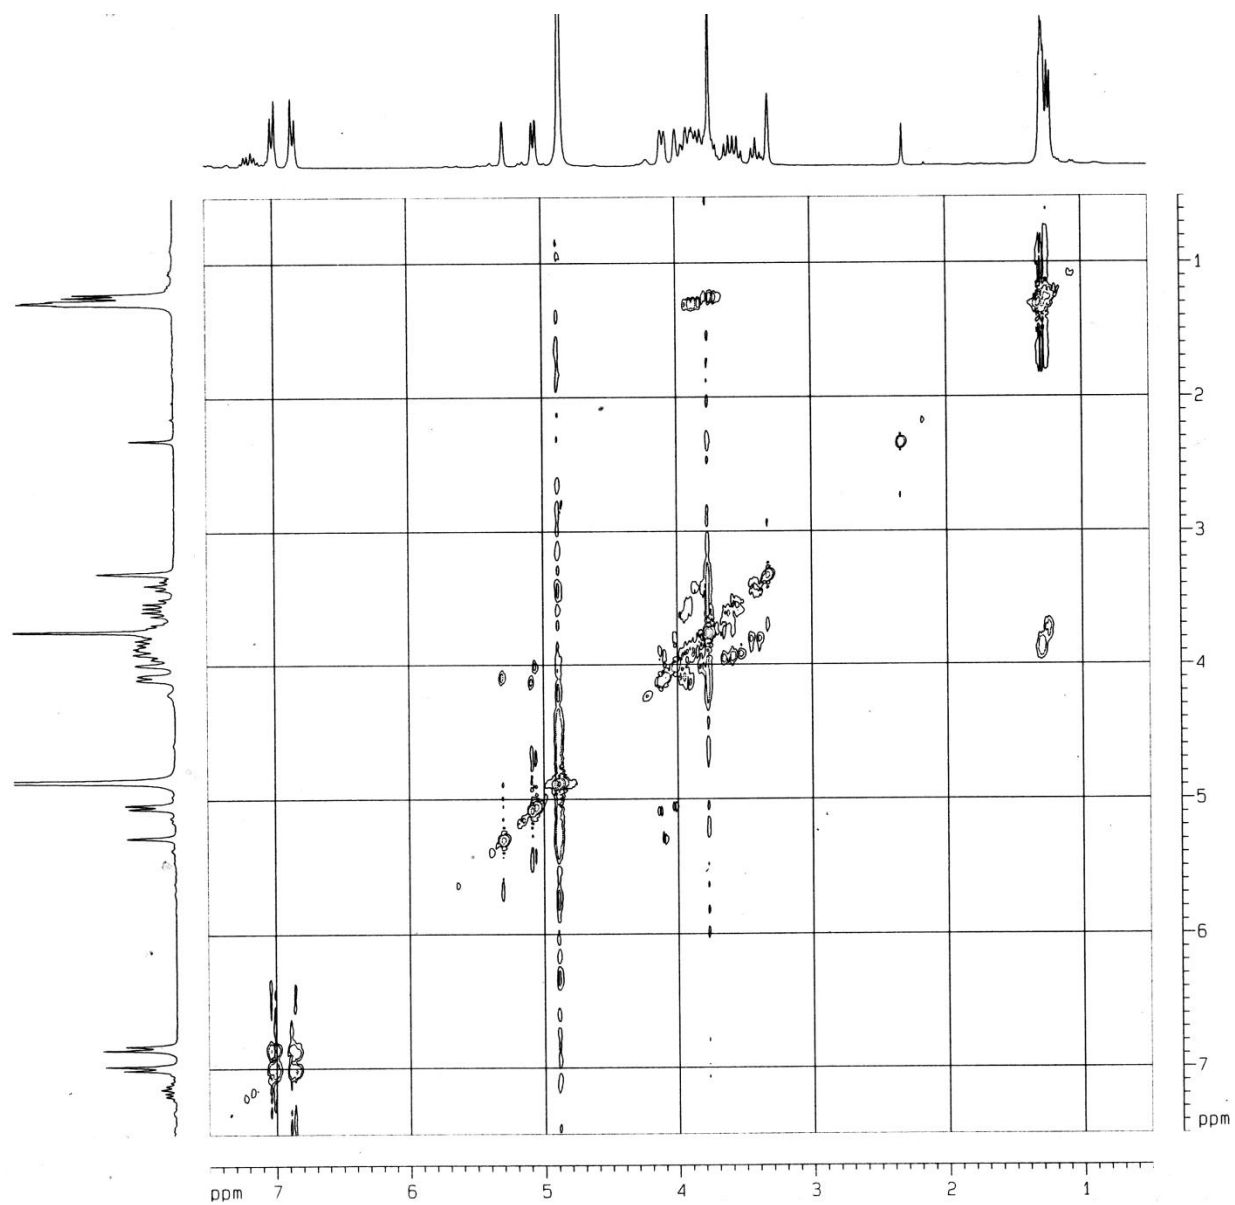

**$^1\text{H}$ - $^1\text{H}$  COSY spectra contd.**

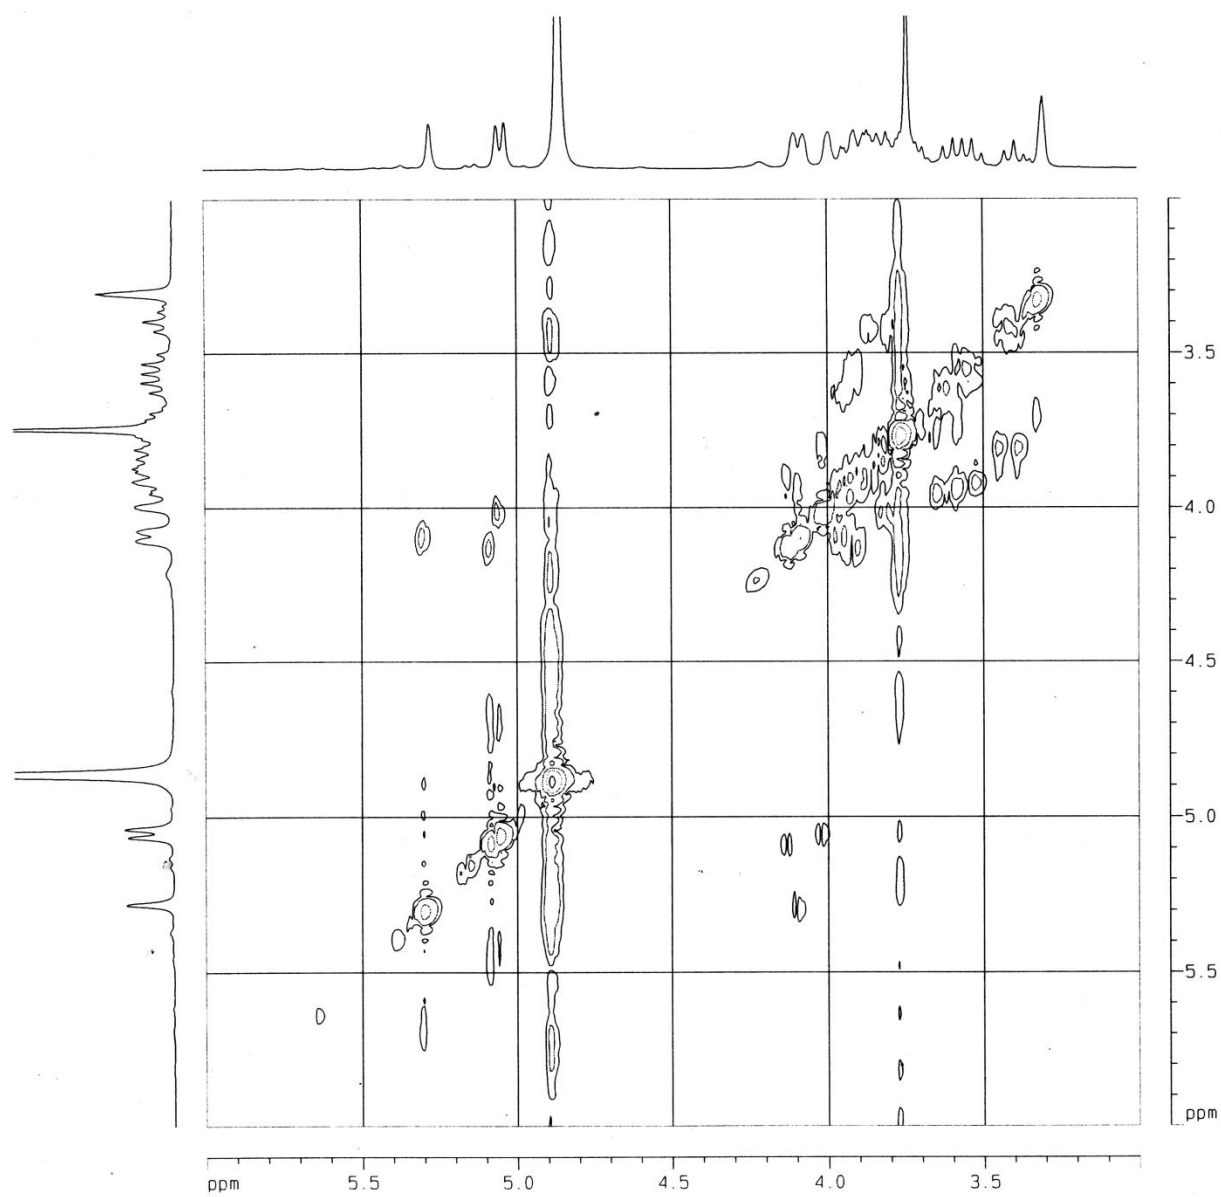

## HSQC spectra of compound 10

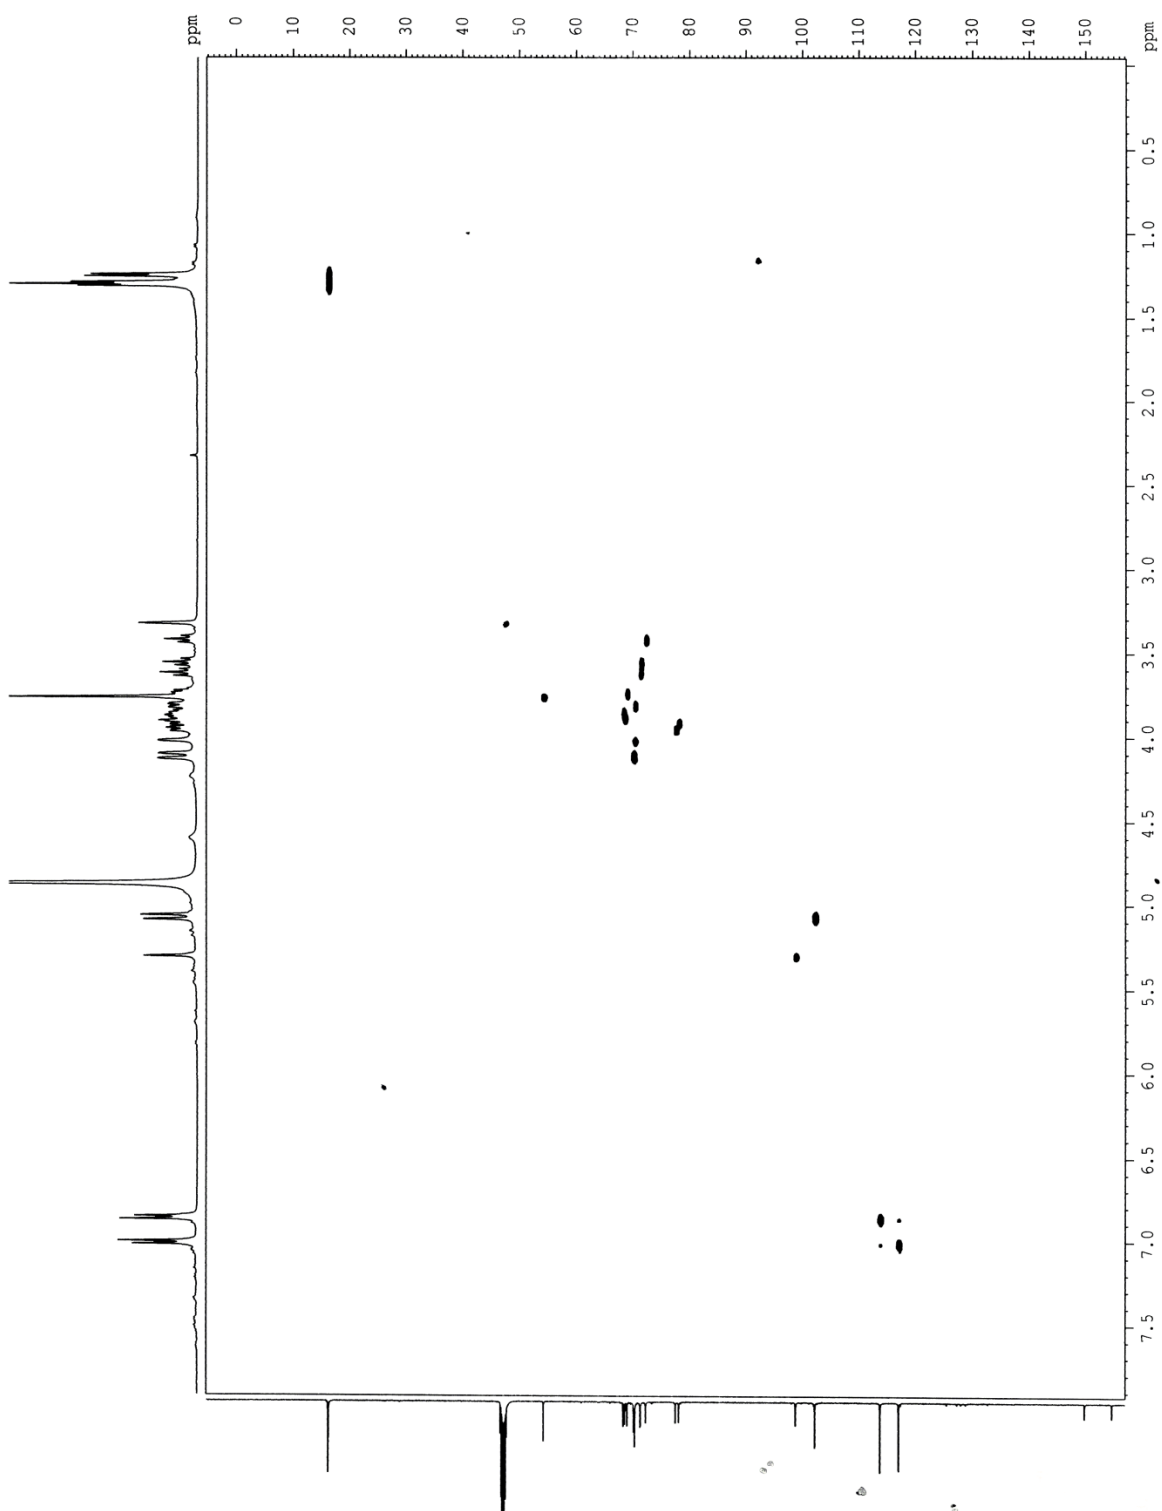

## HSQC spectra contd.

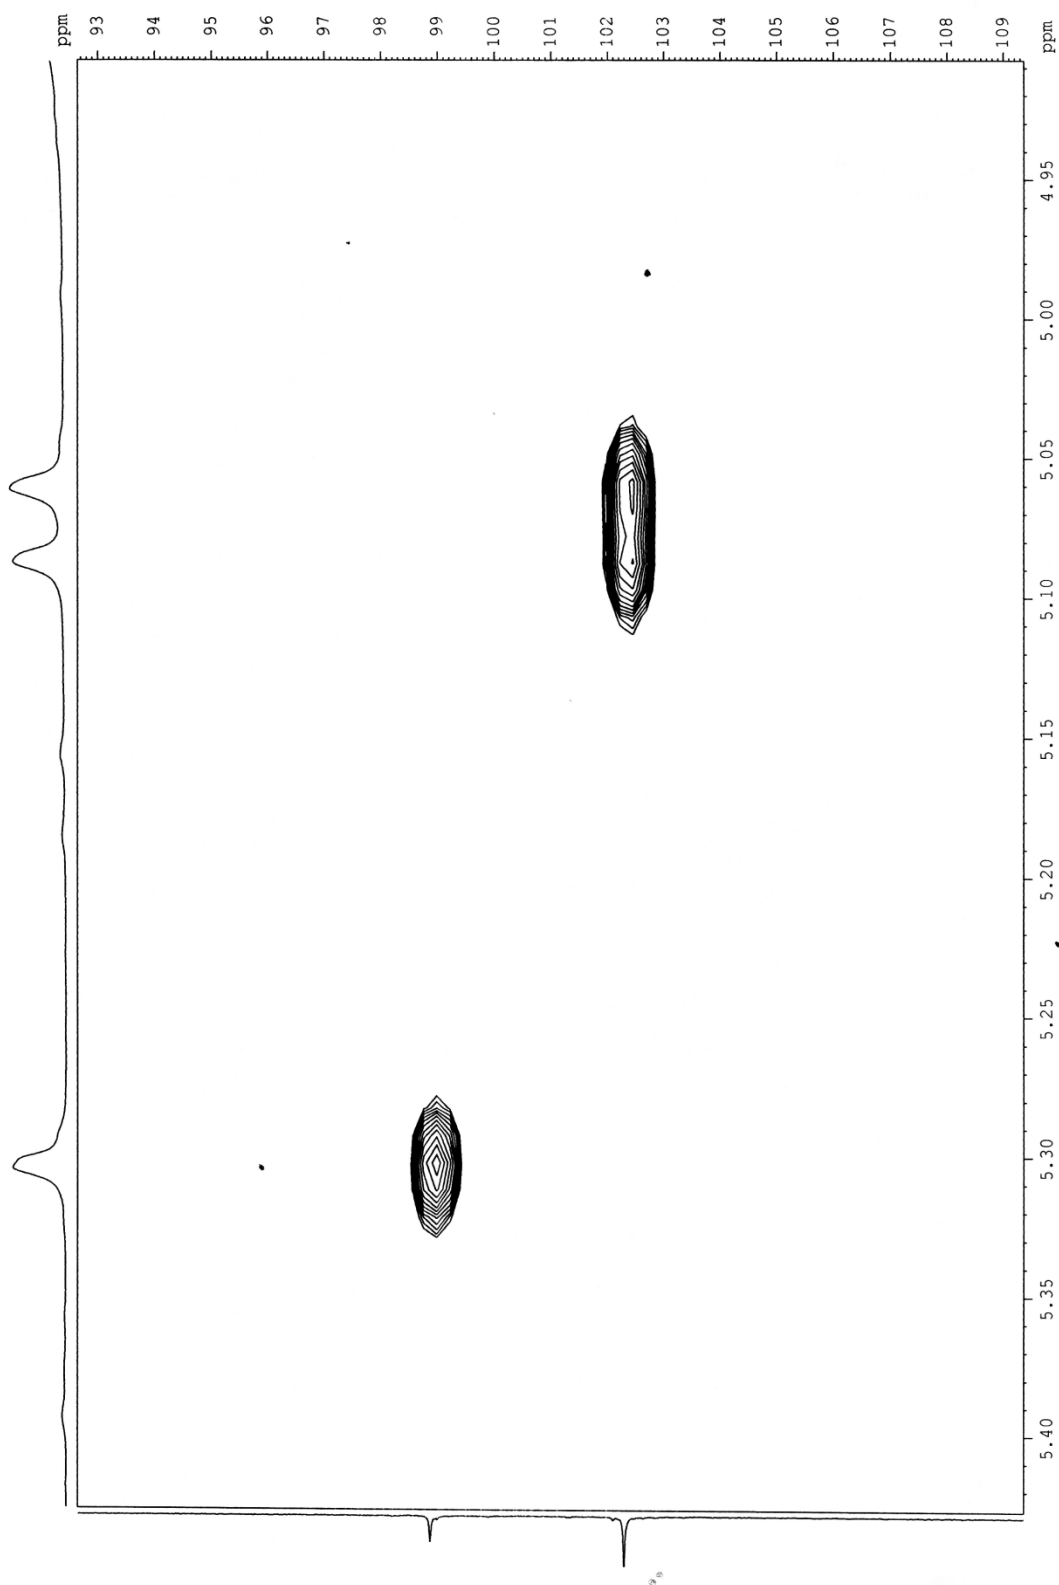

## HSQC spectra contd.

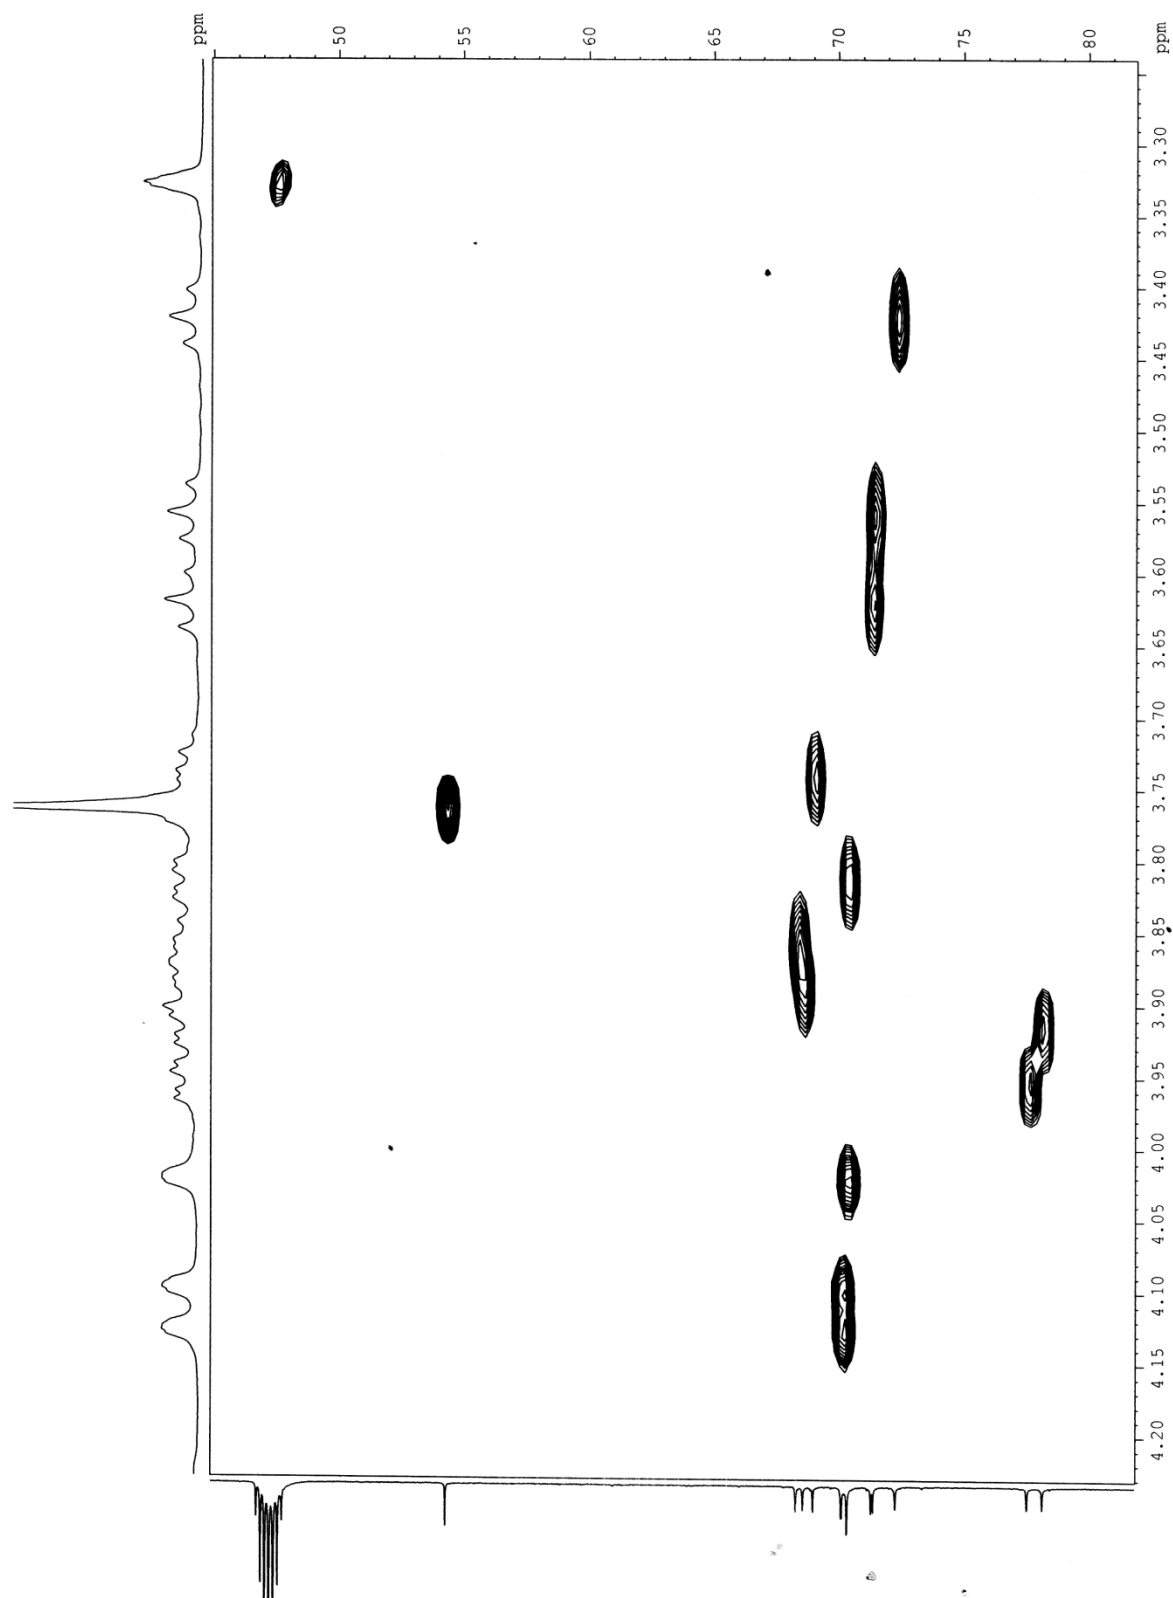

# HMBC spectra of compound 10

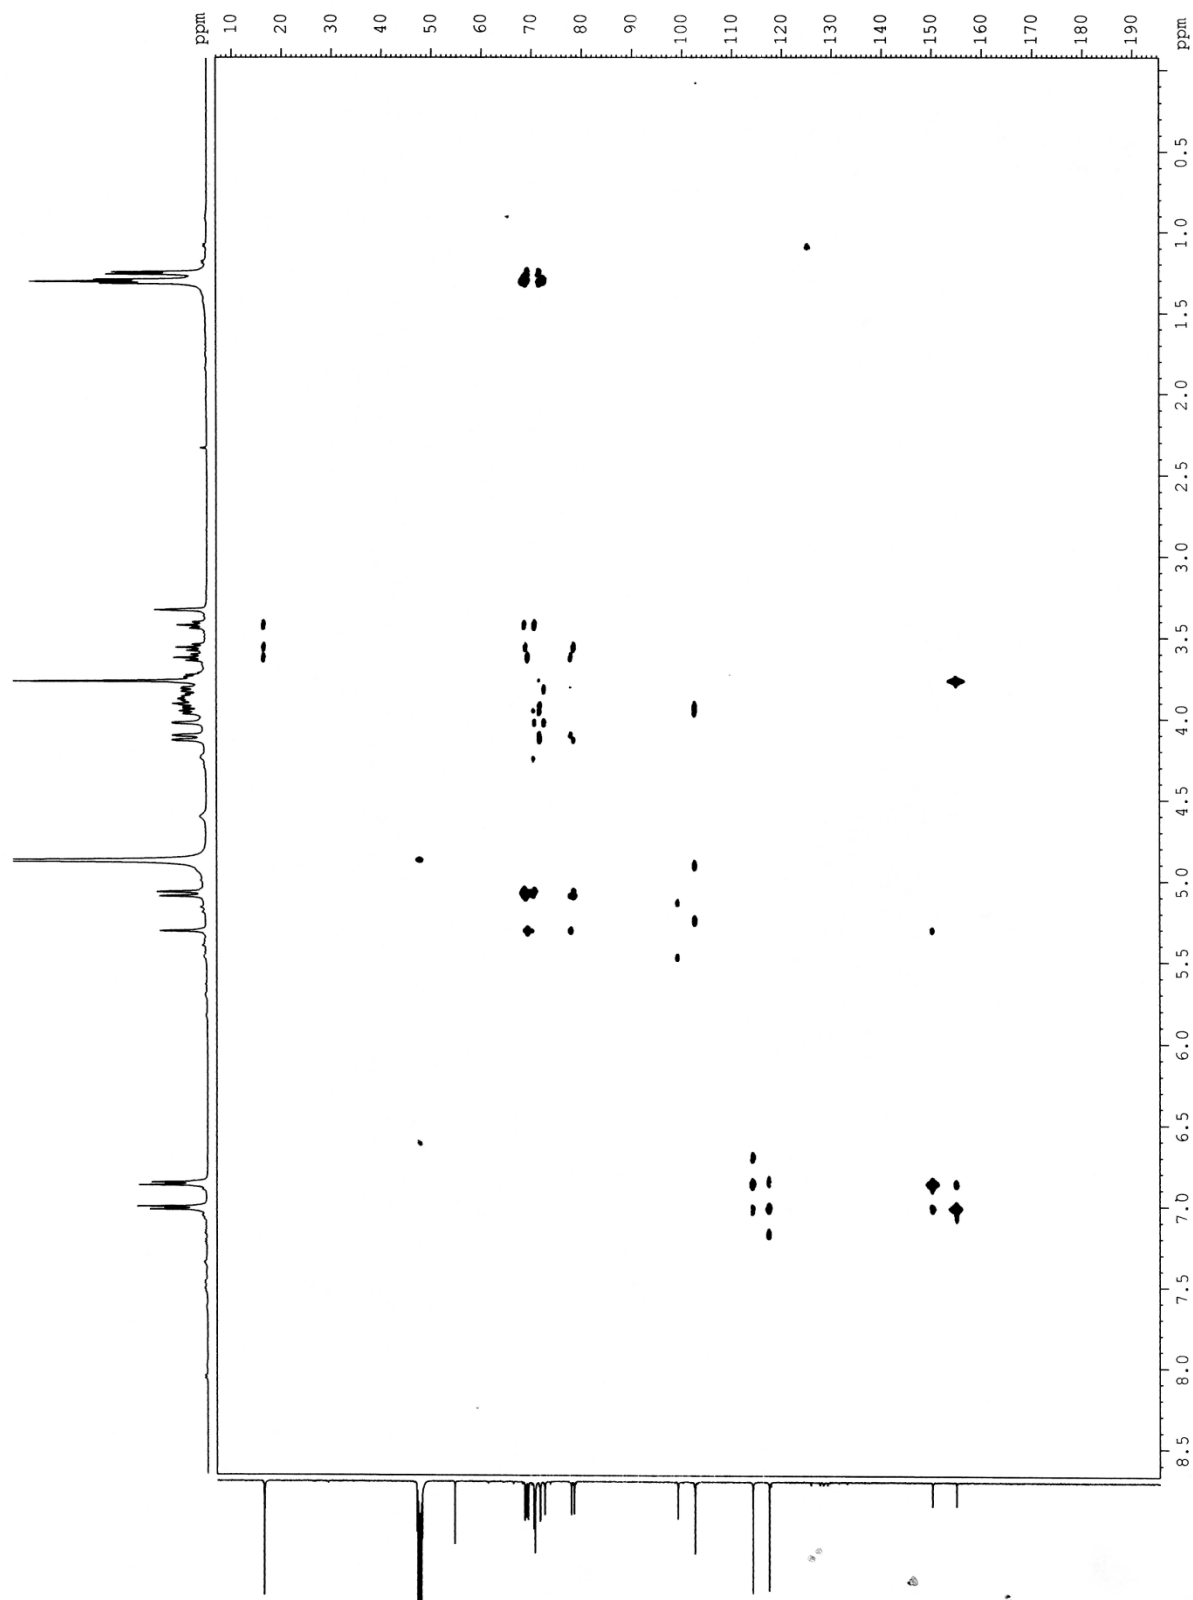



# HMBC spectra contd.

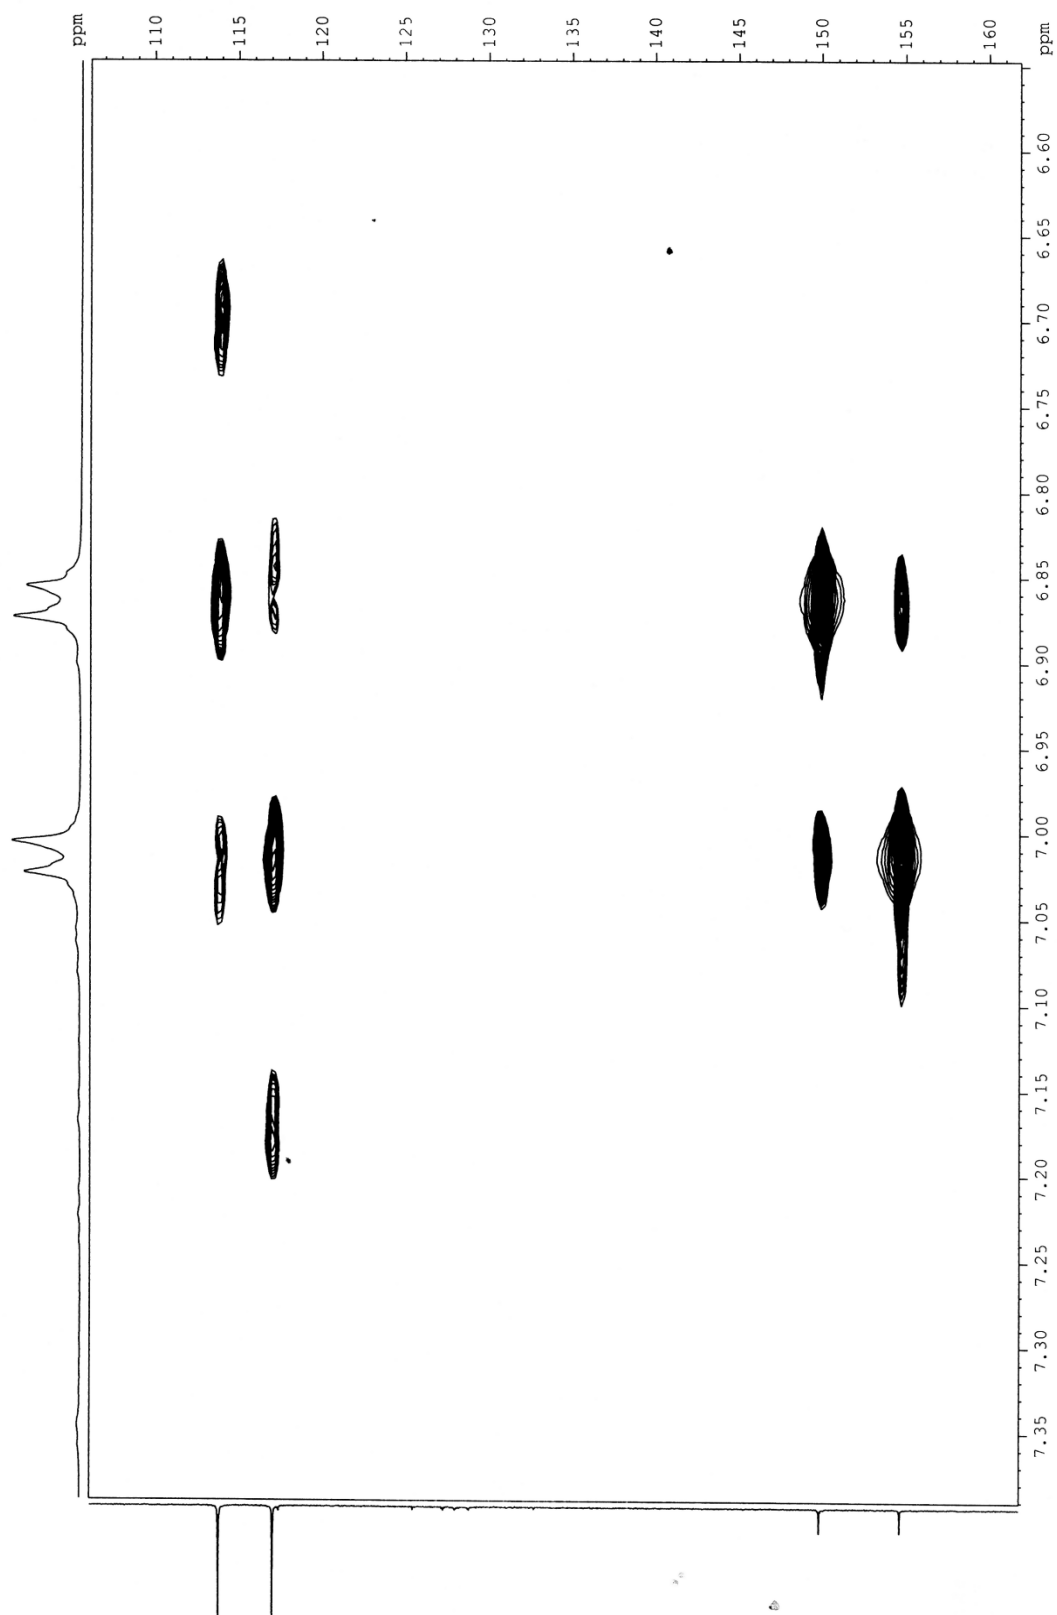

## HMBC spectra contd.

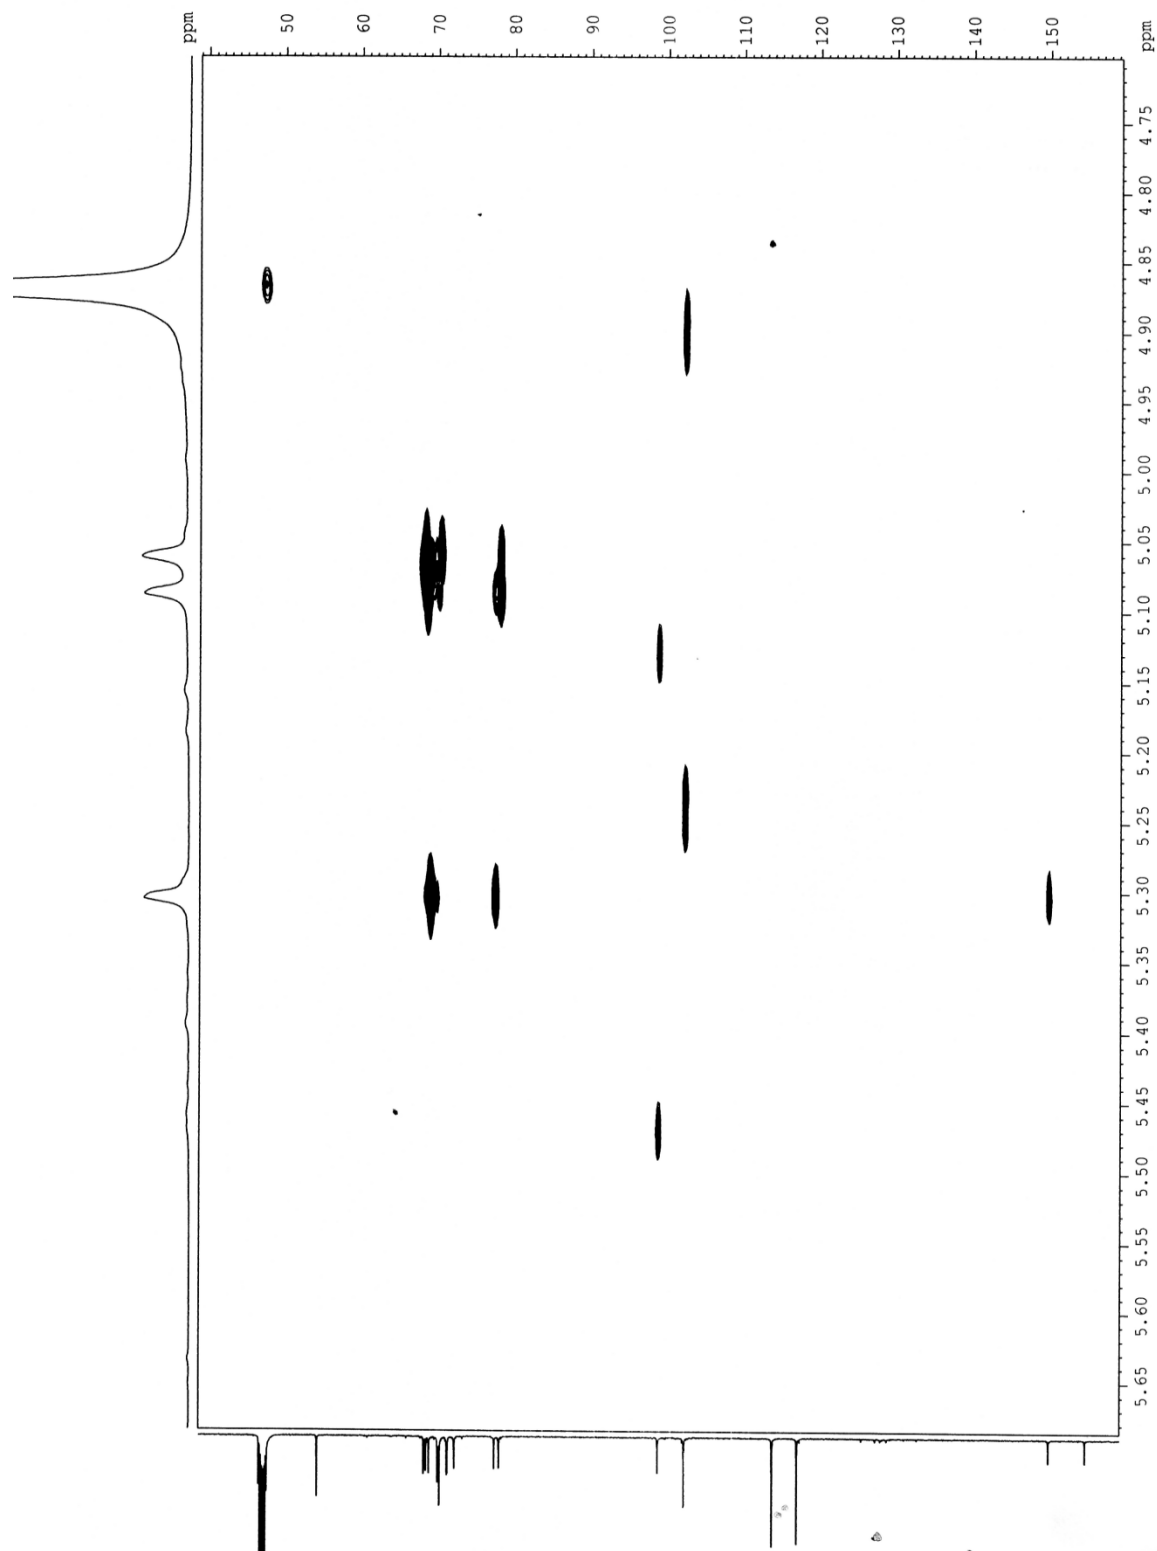

## HMBC spectra contd.

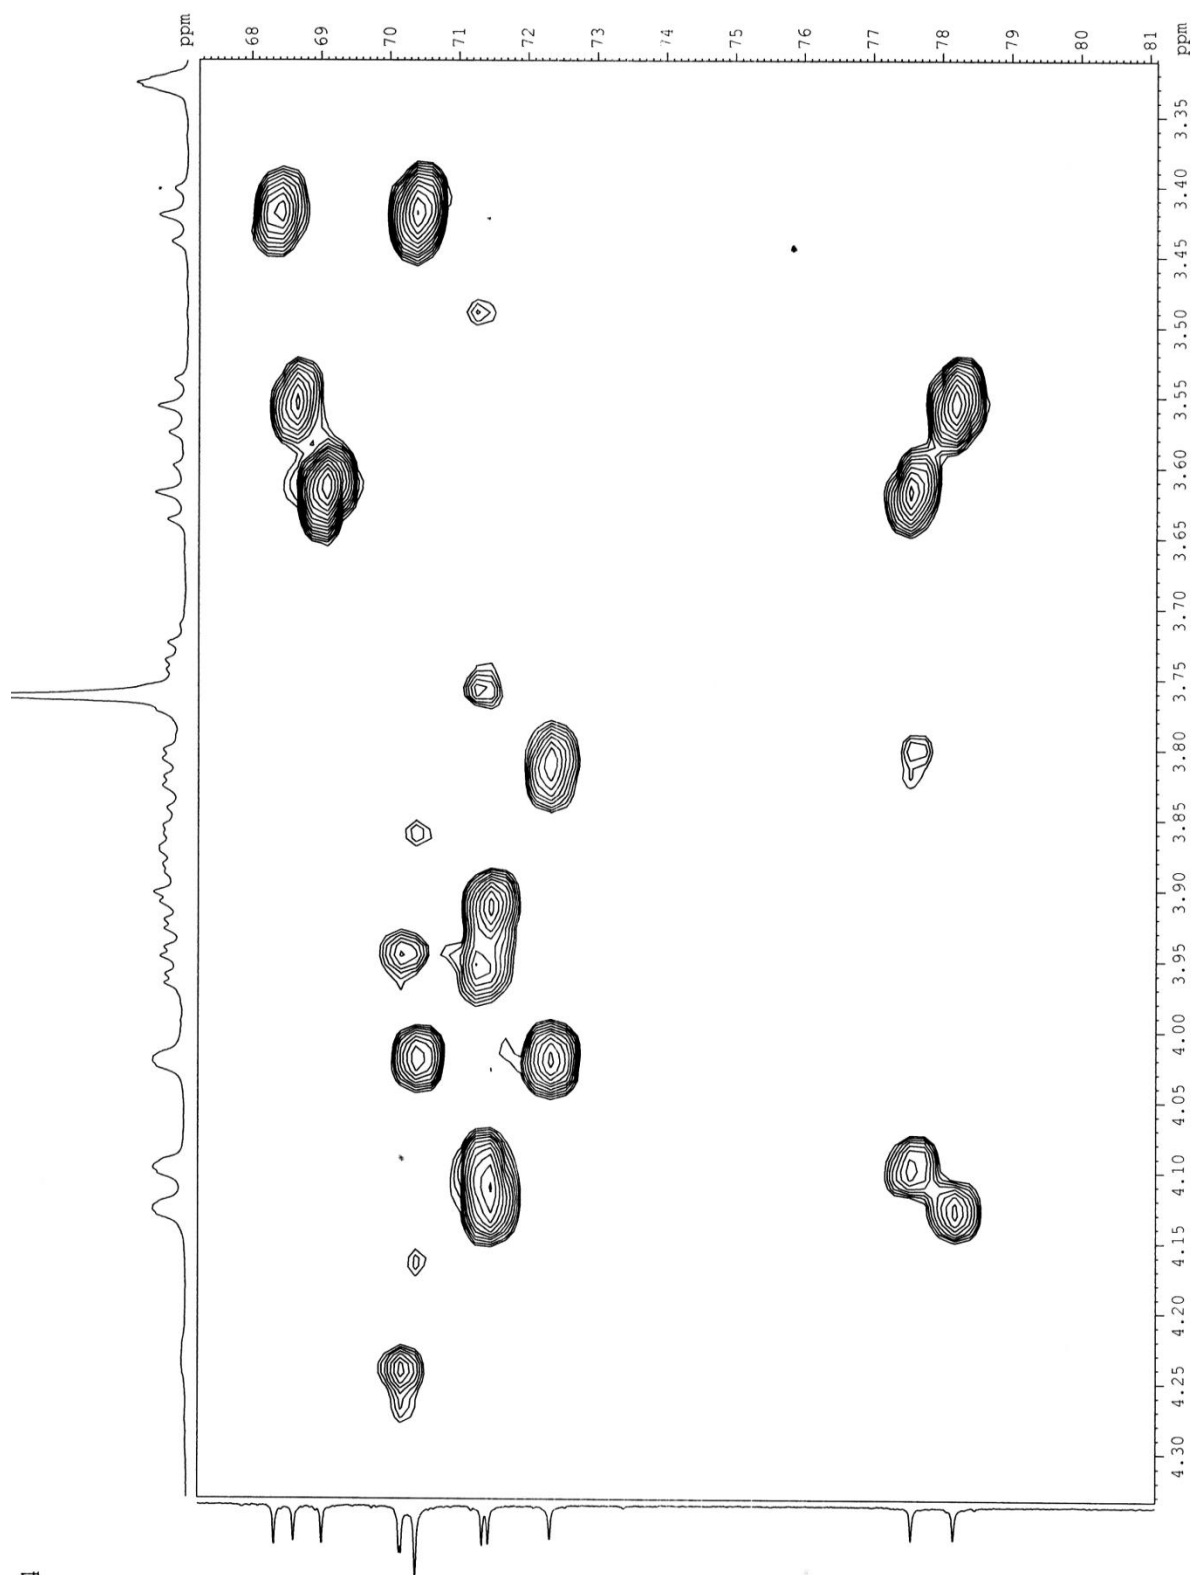

# HMBC spectra contd.

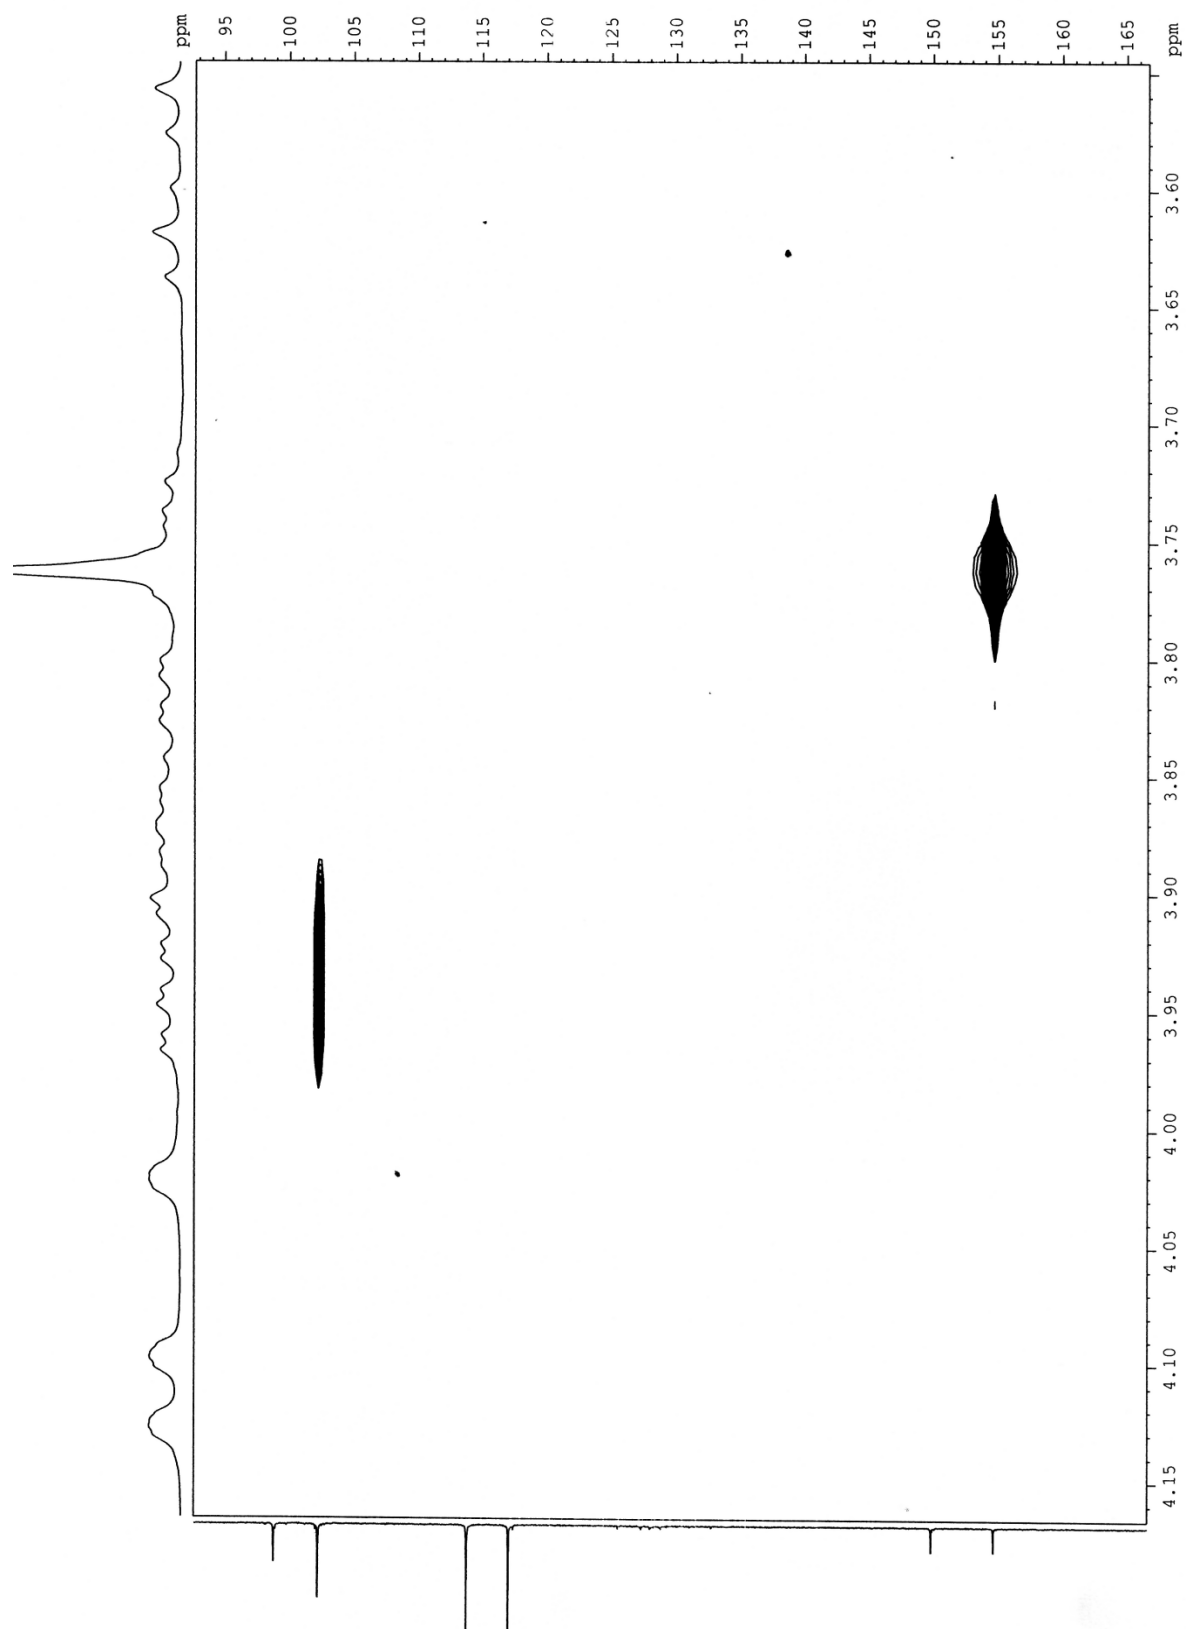

# HMBC spectra contd.

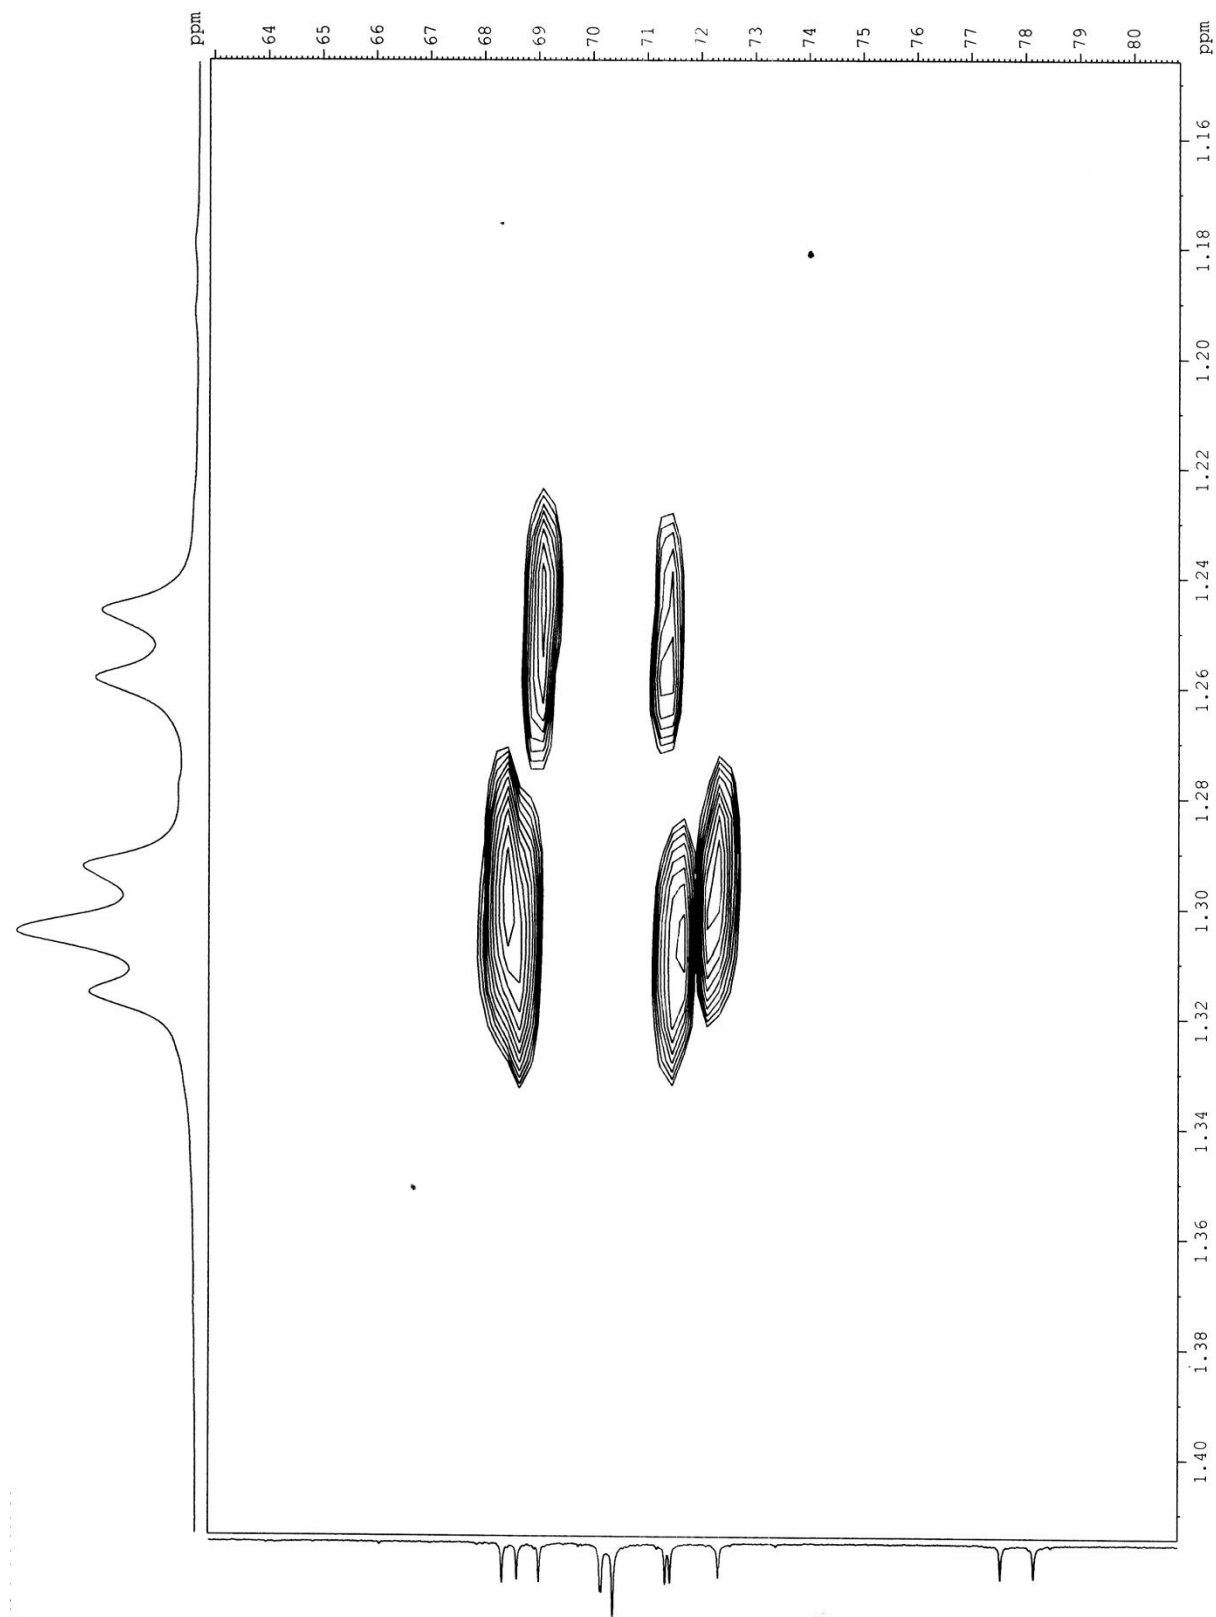

Supplement: Additional file 2 [file 1860-5397-10-153-S2.pdf]
